1           A Plant Protein NbP3IP Induces Autophagy and Mediates the Autophagic  
2                                   Degradation of RSV p3 to Inhibit Viral Infection

3   Liangliang Jiang<sup>1, 2†</sup>, Yuwen Lu<sup>2, 3†</sup>, Xiyin Zheng<sup>4†</sup>, Xue Yang<sup>5</sup>, Ying Chen<sup>5</sup>, Tianhao  
4   Zhang<sup>2</sup>, Xing Zhao<sup>5</sup>, Shu Wang<sup>6</sup>, Xia Zhao<sup>1</sup>, Xijiao Song<sup>7</sup>, Xiangxiang Zhang<sup>2</sup>, Jiejun  
5   Peng<sup>2, 3</sup>, Hongying Zheng<sup>2, 3</sup>, Lin Lin<sup>2, 3</sup>, Stuart MacFarlane<sup>8</sup>, Jianping Chen<sup>1, 2, 3\*</sup>, Yule  
6   Liu<sup>4\*</sup>, Fei Yan<sup>2, 3\*</sup>

7   <sup>1</sup>College of Plant Protection, Nanjing Agricultural University, Nanjing 210095, China.

8   <sup>2</sup>State Key laboratory Breeding Base for Sustainable Control of Pest and Disease, Key  
9   Laboratory of Biotechnology in Plant Protection of MOA and Zhejiang Province,  
10   Zhejiang Academy of Agricultural Sciences, Hangzhou 310021, China

11   <sup>3</sup>Institute of Plant Virology, Ningbo University, Ningbo 315211, China.

12   <sup>4</sup>MOE Key Laboratory of Bioinformatics, Center for Plant Biology, Tsinghua-Peking  
13   Center for Life Sciences, School of Life Sciences, Tsinghua University, Beijing 100084,  
14   China

15   <sup>5</sup>College of Plant Protection, Shenyang Agriculture University, Shenyang 110161, China

16   <sup>6</sup>College of Agriculture and Biotechnology, Zhejiang University, Hangzhou 310058,  
17   China.

18   <sup>7</sup>Public Lab, Zhejiang Academy of Agricultural Sciences, Hangzhou 310021, China

19   <sup>8</sup>The James Hutton Institute, Cell and Molecular Sciences Group, Invergowrie, Dundee  
20   DD2 5DA, UK

21   \* Authors to whom correspondence; E-Mail: yanfei@nbu.edu.cn (F.Y.),  
22    yuleliu@mail.tsinghua.edu.cn (Y. L.) or jpchen2001@126.com (J.C.)  
23    Tel.: +86-571-8640-4003; Fax: +86-571-8640-4258.

24   † These authors contributed equally to this work

25

26

27 **RUNNING TITLE**

28 NbP3IP mediated degradation of the RSV suppressor of RNA silencing by autophagy

29

30 **ABSTRACT**

31 In plants, autophagy is involved in responses to viral infection. However, understanding  
32 of new host factors mediating autophagic clearance of plant viruses is very limited. We  
33 here identified a new host factor NbP3IP participating in autophagy-mediated plant  
34 defense against viral infection. NbP3IP interacted with p3, a RNA silencing suppressor  
35 encoded by Rice stripe virus (RSV), a negative-strand RNA virus, and mediated its  
36 autophagic degradation. NbP3IP could also interact with NbATG8f, which was required  
37 for NbP3IP-mediated p3 degradation. Overexpression of NbP3IP induced autophagy and  
38 down-regulation of NbP3IP reduced autophagy. Both overexpression of NbP3IP and  
39 silencing of GAPC, which also induces autophagy, inhibited RSV infection. In contrast,  
40 silencing of ATG7 promoted RSV infection. Thus, through identification of a new  
41 potential selective autophagy receptor P3IP, we revealed a new mechanism of  
42 autophagy-mediated plant defense against plant viruses and provided the first evidence  
43 that plant autophagy can also play an antiviral role against negative-strand RNA viruses.

44 **KEY WORDS**

45 Autophagy; Rice stripe virus; p3; NbP3IP; ATG8

46

47 **INTRODUCTION**

48 Rice stripe virus (RSV), transmitted by the small brown planthopper (SBPH; *Laodelphax*  
49 *striatellus* Fallén), causes serious epidemics in East Asia, including China, Japan and  
50 Korea (Cheng et al., 2008). RSV belongs to the genus *Tenuivirus* and only infects plants  
51 of the family *Poaceae* by natural SBPH transmission, which is a barrier to studies  
52 exploring the pathogenesis of RSV and its interaction with plants in the field or with its

53 insect vector. In the laboratory, however, RSV can infect the experimental plant *Nicotiana*  
54 *benthamiana* by mechanical inoculation, which has been adopted as a very useful model  
55 system for studying RSV-plant interactions (Xiong et al., 2008; Yuan et al., 2011; Zhang  
56 et al., 2012; Kong et al., 2013; Fu et al., 2018). RSV has four single-stranded RNA  
57 genome segments. RNA1 (~9 kb) is negative-sense and has a single open reading frame  
58 (ORF), encoding the RNA-dependent RNA polymerase (RdRP), in its complementary  
59 strand. Each of the other three segments (RNA2, 3.5 kb; RNA3, 2.5 kb; RNA4, 2.2 kb)  
60 are ambisense and contain two non-overlapping ORFs on opposite strands, separated by a  
61 non-coding intergenic region (IR) that functions in termination of transcription (Zhu et al.,  
62 1991; Zhu et al., 1992; Hamamatsu et al., 1993; Takahashi et al., 1993; Qu et al., 1997;  
63 Wu et al., 2013). RNA2 encodes two proteins, p2 and pc2. p2 has weak RNA silencing  
64 suppressor activity, and pc2 is a nonstructural protein with unknown function, but which  
65 is processed in insect cells into pc2-N and pc2-C (Du et al., 2011; Zhao et al., 2012). On  
66 RNA3, p3 and pc3 are, respectively, the primary viral suppressor of RNA silencing (VSR)  
67 and the nucleocapsid protein (Xiong et al., 2009). RNA4 encodes a disease-specific  
68 protein p4 that can interact with the plant PsbP protein causing viral symptoms, and also  
69 with the viral movement protein pc4 (Xiong et al., 2008; Yuan et al., 2011; Zhang et al.,  
70 2012; Kong et al., 2013). RSV interferes with s-acylation of remorin and induces its  
71 autophagic degradation to facilitate RSV infection (Fu et al., 2018).

72 Autophagy is a conserved eukaryotic mechanism that mediates the degradation of  
73 cytoplasmic components and damaged organelles through lysosomal pathways. This  
74 process involves multiple autophagy-related (ATG) proteins. Autophagy can be induced  
75 by starvation, oxidative stress, drought, salt and pathogen invasion in plants (Bassham,  
76 2007; Liu et al., 2009; Han et al., 2011; Hayward and Dinesh-Kumar, 2011; Bozhkov,  
77 2018). In plants, increasing evidence shows that autophagy plays an important role in  
78 defense against viral infection (Hafren et al., 2017; Haxim et al., 2017; Li et al., 2017;  
79 Hafren et al., 2018; Li et al., 2018; Yang et al., 2018). For example, it has been found that

80 Cotton leaf curl Multan virus (CLCuMuV) infection can induce autophagy in *N.*  
81 *benthamiana* (Haxim et al., 2017). NbATG8f, a key factor in autophagy, could interact  
82 with  $\beta$ C1, the VSR encoded by the satellite DNA of CLCuMuV, which directs  $\beta$ C1 to  
83 autophagosomes for degradation and hence inhibits the infection of CLCuMuV. Beclin1,  
84 one of the central ATGs that is upregulated in Turnip mosaic virus-infected plants, was  
85 found to interact with the viral RdRP, NIB, and mediated its degradation (Li et al., 2018).  
86 Beclin1-mediated NIB degradation was inhibited by autophagy inhibitors and,  
87 moreover, deficiency of Beclin1 or ATG8a enhanced NIB accumulation and promoted  
88 viral infection, indicating that Beclin1-mediated autophagic degradation of NIB plays a  
89 defensive role against TuMV infection. Autophagy was also shown to inhibit the infection  
90 of another positive-sense RNA virus, Barley stripe mosaic virus (BSMV), in *N.*  
91 *benthamiana* (Yang et al., 2018). Moreover, the BSMV  $\gamma$ b protein was found to suppress  
92 the autophagy process by disrupting the interaction between ATG7 and ATG8 (Yang et al.,  
93 2018).

94 Here, we describe a new mechanism of autophagy-mediated plant defense against plant  
95 viruses through a new selective autophagy receptor P3IP. Additionally, our work is the  
96 first to demonstrate the role of autophagy in plant negative-strand virus infection. We  
97 show that the VSR of RSV, p3, interacts with a previously unknown protein of *N.*  
98 *benthamiana* (NbP3IP). We show that NbP3IP also interacts with ATG8f, and  
99 demonstrate that this interaction is responsible for the autophagic degradation of p3. We  
100 further demonstrate that the overexpression of NbP3IP induces autophagy, while  
101 silencing of the *NbP3IP* gene inhibits autophagy, confirming its role in the regulation of  
102 autophagy in plants. Our discovery of the role of NbP3IP in autophagy offers new  
103 opportunities to understand the mechanisms that underlie this essential cellular process.

104

## 105 **RESULTS**

### 106 **The plant protein NbP3IP interacts with RSV p3**

107 To identify possible host proteins that interact with RSV p3, a cDNA library of *N.*  
108 *benthamiana*, the experimental host of RSV, was used for a yeast two-hybrid protein  
109 screening with p3 as the bait. One of the candidate proteins designated as p3 interacting  
110 protein in *N. benthamiana* (NbP3IP) was selected for further analysis. Sequencing  
111 analysis showed that this cDNA clone contained an ORF of 480 nucleotides that was  
112 predicted to encode an 18-kDa protein. In plants, the expression level of the *NbP3IP* gene  
113 was not altered significantly at 9 days post infection (dpi) with RSV but was increased at  
114 20 dpi (Supplementary Fig. S1A). The subcellular localization of NbP3IP was examined  
115 by transiently expressing the protein with GFP fused to its C-terminus in *N. benthamiana*  
116 epidermal cells, which showed that NbP3IP was localized to cytoplasm and nucleus  
117 (Supplementary Fig. S1B).

118 Further Y2H tests confirmed the strong and specific interaction of NbP3IP with RSV  
119 p3 (Fig. 1A). To corroborate that this interaction also occurred in the plant, bimolecular  
120 fluorescence complementation (BiFC) and co-immunoprecipitation (Co-IP) experiments  
121 were performed. We cloned the *NbP3IP* and RSV *p3* genes into the split-YFP vectors  
122 pCV-YFPn-C and pCV-YFPc-C (Lu et al., 2011; Jiang et al., 2014) to express NbP3IP  
123 and p3 with an N-terminal split-YFP tag in *N. benthamiana* plants. Co-expression of  
124 NbP3IP and p3 produced YFP fluorescence at 3 dpi confirming an interaction between  
125 these two proteins, whereas, co-expression of NbP3IP with a control protein (GUS) did  
126 not (Fig. 1B). Similar BiFC experiments were done to co-express NbP3IP with other viral  
127 silencing suppressor proteins (potato virus X (PVX) p25; tomato bushy stunt virus  
128 (TBSV) p19; turnip mosaic virus (TuMV) HC-Pro). None of these proteins was found to  
129 interact with NbP3IP (Supplementary Fig. S2). In a Co-IP assay, plasmids encoding  
130 NbP3IP-eGFP (C-terminal GFP tag) and p3-Myc (C-terminal Myc tag) were transiently  
131 expressed in *N. benthamiana*, with pc3-Myc (RSV complementary strand ORF) used as a  
132 non-interacting (negative) control. Leaf lysates were immunoprecipitated with anti-GFP  
133 beads and any co-precipitated protein detected using an anti-Myc antibody. These

134 experiments demonstrated that NbP3IP interacted with p3 *in vivo* (Fig. 1C). A series of  
135 deletion mutants of p3 were created and tested for interaction with NbP3IP in a BiFC  
136 assay. The various deletions encompassed four helical regions (H1 to H4) that were  
137 previously shown to be important for p3 self-interaction (Kim et al., 2017) and a  
138 positively-charged region (NLS) that was shown to be involved in nuclear localization  
139 and silencing suppression activity (Xiong et al., 2009) (Fig. 1D). Using this approach, the  
140 p3 truncated fragments F6, F7 and F8 were unable to interact with NbP3IP (Fig. 1E).  
141 Thus, the NbP3IP-interacting regions of RSV p3 were mapped to the N-terminal region  
142 (F4) and C-terminal region (F5) and excluded the H1-H4 and NLS domains.

143

#### 144 **NbP3IP inhibits the local VSR ability of RSV p3**

145 Initially, the VSR ability of p3 was confirmed using a co-infiltration assay in  
146 GFP-expressing (16c) transgenic plants. These plants were infiltrated with an  
147 agrobacterium culture expressing GFP (pBIN-GFP) that initially increases GFP levels but  
148 then initiates post-transcriptional gene silencing to degrade GFP mRNAs and abolish  
149 GFP fluorescence. Simultaneously the plants were also infiltrated with agrobacterium  
150 expressing either RSV p3 with a Myc tag (p3-Myc), GUSp-Myc (5' terminal 500bp of the  
151  $\beta$ -glucuronidase gene) or NbP3IP-Myc. At 5 days post infiltration (dpi), green  
152 fluorescence was almost absent in the patch containing pBIN-GFP only, showing that  
153 silencing of the GFP gene had occurred (Fig 2A). In addition, there was little or no GFP  
154 in the patches containing both pBIN-GFP and GUSp-Myc or NbP3IP-Myc, showing that  
155 these proteins could not suppress silencing of the GFP gene. However, strong GFP  
156 fluorescence was apparent in the patch containing pBIN-GFP and p3-Myc, confirming  
157 that the RSV p3 protein does suppress RNA silencing in this assay system. The increased  
158 level of GFP in the p3-treated patch was further confirmed by western blotting, as was the  
159 expression of GUSp-Myc, NbP3IP-Myc and p3-Myc in these plants (Fig. 2B).

160 In a different experiment 16c plants were co-infiltrated with a mixture of pBIN-GFP,

161 p3 and either GUSp-Myc or NbP3IP-Myc. Suppression of GFP silencing by p3 continued  
162 in the presence of GUSp-Myc (Fig. 2C, left) but was prevented in the presence of  
163 NbP3IP-Myc (Fig, 2C, right). Western blotting of GFP proteins extracted from the  
164 infiltrated patches confirmed that the accumulation of GFP in the combination of  
165 pBIN-GFP and p3 plus GUSp was higher than in that of pBIN-GFP and p3 plus NbP3IP  
166 (Fig. 2D). Northern blotting of GFP mRNA from the patches revealed that the expression  
167 level of GFP mRNA in the GUSp-infiltrated patch was higher than the NbP3IP-infiltrated  
168 patch and, correspondingly, the level of GFP-derived siRNA was higher in the  
169 NbP3IP-containing patch compared with the GUSp control patch (Fig. 2D). These results  
170 indicated that the co-expression of NbP3IP inhibited the RNA silencing suppressor  
171 function of p3.

172 To examine whether NbP3IP interferes with silencing suppression by a different VSR,  
173 the GFP patch assay was repeated in the presence of the PVX p25 protein, the TBSV p19  
174 protein or the TuMV HC-Pro. Here, at 5 dpi, all three VSRs suppressed silencing of GFP  
175 regardless of whether they were co-expressed with GUSp or with NbP3IP  
176 (Supplementary Fig. S3). Thus, NbP3IP was shown to specifically interfere with  
177 silencing suppression activity of RSV p3 only.

178

### 179 **NbP3IP mediates the degradation of p3 via the autophagy pathway**

180 It has been reported that deletion of the p3 nuclear localization signal significantly  
181 reduces its silencing suppression activity (Xiong et al., 2009). To investigate whether  
182 NbP3IP influences the function of the p3 silencing suppressor by altering its subcellular  
183 localization, p3-GFP (C-terminal GFP tag) and NbP3IP were co-expressed in  
184 *N.benthamiana*, with unfused RFP (transiently expressed from co-infiltrated pCV-RFP)  
185 being used as a reference protein to allow comparisons of expression levels between  
186 treatments. As a further control, p3-GFP was co-expressed with GUSp and unfused RFP.  
187 Confocal microscopy showed that p3 was localized in both the nucleus and cytoplasm as

188 previously reported (Xiong et al., 2009). However, the intensity of p3-GFP fluorescence  
189 was much lower when co-expressed with NbP3IP than when co-expressed with GUSp,  
190 but no intensity change was seen for the internal control RFP protein (Fig. 3A). Western  
191 blotting using an anti-GFP antibody confirmed that p3 accumulated to a much lower level  
192 when co-expressed with NbP3IP (Fig. 3A). Semi-quantitative RT-PCR testing showed  
193 that the levels of p3-GFP mRNAs were similar in both the NbP3IP- and GUSp-treated  
194 plants, suggesting that the reduced p3 accumulation could be related to a lower stability  
195 or higher turnover rate of the protein (Fig. 3A). In a control experiment, co-expression  
196 with NbP3IP did not change the subcellular location or the accumulation level of unfused  
197 GFP protein (Supplementary Fig. S4A, S4B), indicating that NbP3IP specifically affected  
198 the accumulation of RSV p3. In contrast, the subcellular localization of NbP3IP-GFP was  
199 not affected by co-expression with RSV p3, or any of the other non-interacting silencing  
200 suppressor proteins (p25, p19 or HC-Pro) (Supplementary Fig. S4C).

201 To elucidate which pathway was responsible for the degradation of the p3 protein when  
202 co-expressed with NbP3IP, further infiltrations were done in the presence of either  
203 MG132 (an inhibitor of the 26S proteasome pathway) or 3-methyladenine (3-MA) (an  
204 inhibitor of autophagy) (Seglen and Gordon, 1982; Tanida et al., 2005). Western blotting  
205 showed that accumulation of p3-GFP when co-expressed with NbP3IP was increased by  
206 3-MA treatment (Fig. 3B). but not by MG132 treatment (Fig. 3C). Also, the autophagy  
207 inhibitor 3-MA had no effect on accumulation of p3-GFP in the absence of NbP3IP  
208 (Supplementary Fig. S4D). To further show that NbP3IP-mediated degradation of p3  
209 operates through the autophagy pathway, a TRV-based virus induced gene silencing  
210 (VIGS) experiment was done to silence two autophagy related genes *NbATG5* and  
211 *NbATG7* (Supplementary Fig. S5A). Silencing either *NbATG5* or *NbATG7* inhibited  
212 NbP3IP-mediated degradation of p3 (Fig. 3D and 3E).

213 It is known that ATG8 family proteins execute important functions during autophagy in  
214 various species (Kabeya et al., 2000; Yoshimoto et al., 2004; Nakatogawa et al., 2007;



215 Xie et al., 2008). Using a previously validated approach (Haxim et al., 2017), we  
216 expressed Cyan Fluorescent Protein (CFP)-tagged *N. benthamiana* ATG8f  
217 (CFP-NbATG8f) as an autophagosome marker and examined whether it co-localized in  
218 the cell with the interacting complex of p3 and NbP3IP. As shown in Figure 3F, the  
219 yellow fluorescence of the YFPn-NbP3IP/YFPc-p3 BiFC pair was spatially associated  
220 with the Cyan fluorescence of CFP-NbATG8f, including the overlapping punctate  
221 structures in the cytoplasm and marked by red arrows (Fig. 3F). Combining all of the  
222 above results, we suggest that the degradation of the p3 protein induced by NbP3IP  
223 depends on the autophagy pathway, rather than the proteasome pathway.

224

### 225 **Degradation of p3 via autophagy depends on its interaction with NbP3IP**

226 Down-regulation of cytosolic glyceraldehyde-3-phosphate dehydrogenase (GAPCs) gene  
227 expression by VIGS significantly activates autophagy in *N.benthamiana*, which can be  
228 visualized by the increase in appearance in the cytoplasm of autophagic bodies containing  
229 the NbATG8f protein (Han et al., 2015). Hence, we employed this strategy to induce  
230 autophagy and tested whether the degradation of p3 via the autophagy pathway occurred  
231 in the absence of NbP3IP. Knockdown of GAPC1, GAPC2 and GAPC3, inducing  
232 autophagy, was confirmed by qRT-PCR and confocal microscopy (Supplementary Fig.  
233 S5B, S5C, S5D). As shown in Figure 4A, the accumulation of expressed p3-GFP in  
234 GAPCs-silenced plants (TRV:GAPCs) showed no obvious differences compared with  
235 control (TRV:00) plants. However, the accumulation of p3-GFP co-expressed with  
236 NbP3IP in TRV:GAPCs plants was evidently lower than when it was co-expressed with  
237 NbP3IP in TRV:00 plants (Fig. 4B). Thus, even when autophagy is stimulated, RSV p3 is  
238 not degraded unless it is co-expressed with NbP3IP. The previous experiments showed  
239 that mutant F8 of p3 did not interact with NbP3IP. As shown in Figure 4C, in  
240 TRV:GAPCs plants, F8-GFP was not degraded via autophagy even when co-expressed  
241 with NbP3IP, suggesting that the autophagic degradation of p3 required its physical

242 interaction with NbP3IP.

243

### 244 **NbP3IP mediates p3 degradation by interacting with NbATG8f**

245 It has been reported that ATG8 family proteins act as the cargo acceptor participating in  
246 the degradation of several plant virus proteins (Haxim et al., 2017; Li et al., 2018). To  
247 determine whether p3 or NbP3IP interacted with NbATG8, BiFC was employed in a  
248 paired interaction assay. As shown in Figure 5A (upper panels), co-expression of  
249 YFPn-NbP3IP and YFPc-NbATG8f produced YFP fluorescence in the cytoplasm and  
250 nucleus indicating an interaction, whereas, YFPc-NbATG8f and YFPn-p3 did not interact.  
251 In a Co-IP assay using GFP-TRAP beads, NbP3IP-Myc was specifically co-precipitated  
252 by GFP-NbATG8f (Fig. 5B), confirming the interaction between NbP3IP and NbATG8f.

253 To further investigate NbP3IP, two mutant constructs of NbP3IP were made containing  
254 either only the N-terminal amino acids 1-60 (mutant NbP3IP-S1) or the C-terminal amino  
255 acids 60-159 (mutant NbP3IP-S2) (Fig. 5C). In contrast to wild-type NbP3IP (Fig. 5B)  
256 the NbP3IP-S2 fragment did not co-precipitate with NbATG8f (Fig. 5E), although, it did  
257 interact with RSV p3 in Y2H (Fig. 5D) and BiFC assays (Fig. 5A, lower left panels).  
258 Nevertheless, even though mutant NbP3IP-S2 could interact with p3, this interaction did  
259 not inhibit the VSR ability of p3 (Fig. 5F), suggesting that NbP3IP is required to interact  
260 with NbATG8f for the degradation of RSV p3 to occur.

261

### 262 **Autophagy is induced during RSV infection and negatively regulates its infection**

263 Due to the involvement of NbATG8f in the degradation of p3, we investigated whether  
264 RSV infection had any effect on autophagy. We applied quantitative real-time  
265 reverse-transcription PCR (qRT-PCR) to examine the transcription levels of various  
266 autophagy-related genes during RSV infection. As shown in figure 6A, mRNA levels of  
267 *NbATG2*, *NbATG4*, *NbATG6*, *NbATG7*, *NbATG9*, *NbPI3K* and *NbVps15* were all  
268 upregulated in RSV-infected upper leaves at 20 dpi. We also used CFP-NbATG8f as an

269 autophagosome marker to observe the increased number of punctate autophagic bodies in  
270 RSV infected plants compared to those in uninfected plants (Fig. 6B). These results  
271 indicated that RSV infection activated autophagy.

272 Since RSV p3 was degraded via the autophagy pathway, we hypothesized that  
273 autophagy negatively regulates RSV infection. To validate this hypothesis, TRV:GAPCs  
274 plants, in which autophagy was activated (described above; Supplementary Fig. S5C,  
275 S5D), were infected with RSV. Compared to control plants (TRV:00), the upper leaves of  
276 TRV:GAPCs plants showed less leaf curling, a known symptom of RSV infection (Fig.  
277 6C) and contained lower levels of virus as revealed by analysis of accumulation of RSV  
278 capsid protein mRNA and protein (Fig. 6D). Meanwhile, in ATG7-silenced and  
279 ATG5-silenced plants (TRV:ATG7, TRV:ATG5), in which the autophagy activity was  
280 inhibited, RSV infection symptoms were more severe (increased mosaic and dwarfing)  
281 and were accompanied by higher accumulation levels of RSV capsid protein mRNA and  
282 protein (Fig. 6E, 6F and Supplementary Fig. S5E). These results indicated that autophagy  
283 operates to reduce RSV infection in plants.

284

### 285 **NbP3IP participates in the regulation of autophagy**

286 We next devised a series of experiments to examine the role of NbP3IP in the absence of  
287 RSV p3, once again using transient expression of CFP-NbATG8f to visualize autophagic  
288 activity (Han et al., 2015; Huang and Liu, 2015). Thus, we observed an increase of about  
289 2.5-fold in the numbers of autophagosomes following the transient expression of  
290 NbP3IP-Myc and CFP-NbATG8f as compared with co-expression of GUSp-Myc and  
291 CFP-NbATG8f (Fig. 7A and 7B). Transmission electron microscopy (TEM) was also  
292 used to verify the autophagy activation in this study. Compared to the control plants, we  
293 could clearly observe increased numbers of autophagic structures in leaves with transient  
294 expression of NbP3IP (Fig 7C). There was about a 2-fold increase in the number of  
295 visible structures typical of autophagosomes in the cytoplasm (Fig 7D). However,

296 expressing p3 alone could not induce autophagy according to confocal microscopy and  
297 TEM observations (Supplementary Fig. S6), In addition, we employed expression of  
298 CFP-NbATG8f to monitor autophagy in NbP3IP-silenced TRV VIGS plants  
299 (Supplementary Fig. S7A). Confocal microscopy showed that there were many fewer  
300 autophagosomes as represented by CFP-NbATG8f puncta in NbP3IP-silenced plants  
301 (TRV:NbP3IP) compared with control plants (Fig. 7E, 7F). Compared to TRV:00 control  
302 plants, the mRNA levels of ATGs were down-regulated in NbP3IP-silenced plants  
303 (Supplementary Fig. S7B). Taken together, these data suggest that NbP3IP is a new  
304 player in the regulation of autophagy.

305

### 306 **RSV infection is reduced in transgenic *N. benthamiana* plants over-expressing** 307 **NbP3IP**

308 Three transgenic *N. benthamiana* lines (OENbP3IP-1, OENbP3IP-2, OENbP3IP-3) were  
309 created in which NbP3IP mRNA levels were increased 3-fold compared to non-transgenic  
310 plants (Fig 8A). mRNA levels of autophagy-related genes were similarly increased in the  
311 NbP3IP-overexpressing transgenic plants (Fig. 8B). When challenged with RSV, these  
312 plants showed delayed and milder symptoms compared to control plants (Fig. 8C and 8D).  
313 In addition, the accumulation levels of RSV capsid protein and RNA were reduced at 15  
314 dpi in the systemically infected leaves of the transgenic lines compared with control  
315 plants (Fig. 8E). Taken together, our results demonstrate that overexpression of NbP3IP  
316 reduces RSV infection in *N. benthamiana* plants.

317

## 318 **DISCUSSION**

319 To combat infecting viruses, plants possess several defense mechanisms targeting either  
320 the viral nucleic acid or viral proteins. Autophagy, which functions as a pivotal  
321 component of host immunity, directly or indirectly retards viral infection through  
322 degrading viral proteins. The autophagy-related proteins, NBR1, ATG6 (Beclin-1) and

323 ATG8f, that function as cargo receptor and adaptor proteins, directly interact with  
324 virus-encoded proteins and mediate their degradation (Hafren et al., 2017; Haxim et al.,  
325 2017; Li et al., 2018). Similarly, a host calmodulin-like protein, rgs-CaM was shown to  
326 bind and send the cucumber mosaic virus (CMV) 2b silencing suppressor protein to  
327 autolysosomes for proteolytic degradation (Nakahara et al., 2012).

328 Indeed, the targeting of viral suppressors of RNA silencing (VSRs) is a frequently  
329 adopted strategy employed by plants to defend themselves against virus infection. Host  
330 factors such as ALY proteins, rgs-CaM (from *Nicotiana tabacum*) and ZmVDE  
331 (violaxanthin deepoxidase protein of *Zea mays*) have all been shown to interfere with the  
332 RNA silencing suppression activity of different VSRs (Canto et al., 2006; Nakahara et al.,  
333 2012; Chen et al., 2017). In this work, a plant protein (designated as NbP3IP), with a  
334 previously unknown function, was identified by screening for interaction with the RSV  
335 p3 VSR protein. Using a transient assay, we found that expression of NbP3IP inhibited  
336 the VSR ability of p3 by targeting p3 for degradation via the autophagy pathway.  
337 Degradation of p3 required the interaction between NbP3IP and p3, and also an  
338 interaction between NbP3IP and NbATG8f, a protein known to be involved in  
339 autophagosome formation (Nakatogawa et al., 2007; Xie et al., 2008). Furthermore,  
340 activation of autophagy is caused by up-regulated expression of NbP3IP, independent of  
341 the expression of p3.

342 In plants, autophagy is induced by environmental stresses, including abiotic stress,  
343 such as heat, cold, drought, oxidation, salt, starvation and biotic stress, such as, pathogen  
344 invasion and herbivory (Bassham, 2007; Han et al., 2011; Han et al., 2015; Zhu, 2016;  
345 Haxim et al., 2017; Hofius et al., 2017; Avin-Wittenberg, 2018; Li et al., 2018). Initiation  
346 of autophagy in plants is usually associated with increasing mRNA levels of *ATG* genes,  
347 altered accumulation of phytohormones or accumulation of ROS (reactive oxygen species)  
348 (Yoshimoto et al., 2009; Perez-Perez et al., 2010; Han et al., 2015; Zhai et al., 2016;  
349 Haxim et al., 2017). In starvation-induced mammalian cells, glyceraldehyde 3-phosphate

350 dehydrogenase (GAPDH), phosphorylated by AMP-activated protein kinase (AMPK),  
351 redistributes into the nucleus and directly interacts with Sirtuin 1 (Sir1) to cause it to  
352 become activated, which is required to initiate autophagy (Chang et al., 2015).  
353 Furthermore, Cong Yi *et al.* found that a histone acetyltransferase, which acetylated the  
354 K19 and K48 of ATG3, was required for initiation of autophagy in *Saccharomyces*  
355 *cerevisiae* (Yi et al., 2012). The direct mechanism(s) for initiating autophagy in plants,  
356 including plant virus-induced autophagy, is largely unknown. Some components of  
357 autophagy such as NbATG6 and NbATG8f have been shown to directly participate in  
358 plant defense against TuMV and CLCuMuV, respectively (Haxim et al., 2017; Li et al.,  
359 2018). In our work, autophagy was activated by the infection of RSV, which also  
360 up-regulated the transcription levels of *NbP3IP* and other known autophagy-related genes  
361 including *NbATG2*. Similarly, over-expression of *NbP3IP* in stably transformed plants  
362 also increased the expression of *NbATG2* and other autophagy-related genes.

363 In our study, *NbP3IP* interacted with *NbATG8* to antagonize RSV infection by  
364 degrading its VSR p3 protein. However, *NbATG8f* could not directly interact with the p3  
365 protein, which suggested that *NbP3IP* might act as an adaptor to form a complex with  
366 *NbATG8f* and p3. Interestingly, protein BLAST analysis identified proteins of unknown  
367 function from Arabidopsis, rice and garlic containing small regions of similar sequence  
368 (Supplementary Fig. S8). Indeed, one such conserved sequence is the motif YxxL/I  
369 (Supplementary Fig. S8), which resembles the LC3-interacting region (LIR) motif found  
370 in receptor proteins involved in the formation of phagosomes during selective autophagy  
371 processes (Birgisdottir et al., 2013). Hence, we argue that the involvement of *P3IP* with  
372 autophagy might exist and be conserved in other plant species.

373 Taken together, our results demonstrate that *NbP3IP* functions as a newly identified  
374 regulator of autophagy to regulate viral infection in plants and that autophagy also  
375 contributes to plant antiviral defense against the negative-strand RNA virus RSV. Based  
376 on our results, a working model of *NbP3IP*-mediated autophagy defense against RSV

377 infection can be outlined (Fig. 9), whereby, RSV infection induces the expression of  
378 NbP3IP, which activates autophagy. NbP3IP recognizes RSV p3 and carries it to the  
379 autophagosome by interacting with NbATG8f. Degradation of p3 prevents it from  
380 interfering with the plant RNA silencing system, thereby allowing the RSV RNAs to be  
381 targeted and RSV infection to be constrained

382

## 383 **METHODS**

### 384 **Plant materials and growth conditions**

385 GFP-transgenic line 16c *N. benthamiana*, wild type *N. benthamiana* and  
386 OENbP3IP-transgenic *N. benthamiana* plants were grown in pots under constant  
387 conditions of 60% relative humidity and a 16h light/8h dark photoperiod. For transgenic  
388 overexpression of *NbP3IP* which was cloned into the pCV vector (Lu et al., 2011),  
389 *Agrobacterium*-mediated transformation of *N. benthamiana* plants was conducted  
390 following a standard protocol (Horsch RB, 1985), and the regenerated transformants were  
391 screened as previously described (Shi et al., 2016).

392

### 393 **Plasmid construction**

394 Gene sequences were amplified by PCR using *ExTaq* DNA Polymerase (TaKaRa) for  
395 cloning purposes (primers are listed in supplementary table 1). The full length clones of  
396 RSV p3 and pc3 were generated from cDNA derived from *Oryza sativa* infected with  
397 Rice stripe virus and the full length clone of NbP3IP was generated from cDNA derived  
398 from *N. benthamiana*. For the Y2H assay, genes were ligated into pGBKT7 and pGADT7  
399 to yield pGBK-NbP3IP, pGBK-NbP3IP-S1, pGBK-NbP3IP-S2 and pGAD-p3,  
400 respectively. For BiFC assays, inserts were ligated into pCV-YFPn-C and pCV-YFPc-C  
401 (YFP added as an N-terminal fusion) (Lu et al., 2011) to construct pCV-YFPn-NbP3IP,  
402 pCV-YFPc-NbP3IP, pCV-YFPn-p3, pCV-YFPc-p3, pCV-YFPn-NbP3IP-S2,  
403 pCV-YFPn-NbATG8f and pCV-YFPc-NbATG8f. Plasmids pCV-YFPn-GUS,

404 pCV-YFPc-GUS were described previously (Jiang et al., 2014). For transient expression  
405 analysis in plants cells, full length NbP3IP, p3 and pc3, and the partial fragments of  
406 NbP3IP (NbP3IP-S1, NbP3IP-S2), flanked with *Xba*I and *Kpn*I restriction sites, were  
407 introduced into vector pCV-eGFP (Lu et al., 2011) for subcellular localization studies; the  
408 full length of NbP3IP, p3 and pc3 with a C-terminal Myc tag, the partial fragment of  
409 NbP3IP (NbP3IP-S2) and GUS (GUSp) with C-terminal tagged Myc, flanked with *Xba*I  
410 and *Sac*I restriction sites, were introduced into pCV empty vector for transient  
411 overexpression experiments (Lu et al., 2011). The full length clone of NbATG8f was  
412 generated from cDNA derived from *N. benthamiana*. The resulting DNA fragment was  
413 purified and transferred into the entry vector pDONR207 (Invitrogen) by recombination  
414 using BP Clonase (Invitrogen), pDONR207 clones were further transferred into the  
415 Gateway vector pGWB6 (Nakagawa et al., 2007) (GFP as an N-terminal fusion) to yield  
416 pGWB6-NbATG8f.

417

#### 418 **Virus-induced gene silencing**

419 A partial sequence of NbP3IP was amplified with primers that are listed in supplementary  
420 table 1 and cloned into pTRV2 using flanking *Cla*I and *Sal*I restriction sites, producing  
421 the vector TRV:NbP3IP. Viral infection by *Agrobacterium* infiltration to initiate NbP3IP  
422 silencing was performed as described previously (Peng et al., 2011).

423

#### 424 **RNA extraction and Northern blotting**

425 Total RNA was extracted from plants using Trizol (Invitrogen, Carlsbad, California, USA)  
426 according to the manufacturer's instructions. For Northern blot analyses, DNA templates  
427 for synthesis of RSV CP and mGFP probes were amplified with primers that are listed in  
428 supplementary table 1. The probes were labeled with digoxigenin (DIG) according to the  
429 manufacturer's protocol (DIG High Prime DNA Labeling and Detection Starter Kit II,  
430 Roche, Basel, Switzerland). Northern blot procedures were performed as previously



431 described (Jiang et al., 2014). For small RNA Northern blotting, 20 µg of total RNA was  
432 separated on a 15% polyacrylamide gel, and transferred electrophoretically to Amersham  
433 Hybond<sup>TM</sup>-NX membranes (GE Healthcare) using H<sub>2</sub>O for 1h (Guo et al., 2012).  
434 Chemical crosslinking was conducted to fix the RNA to the membrane (Pall et al., 2007).  
435 Four different segments of the GFP gene (150bp) were used as templates to synthesis  
436 DIG-labeled probes according to the manufacturer's protocol (DIG High Prime DNA  
437 Labeling and Detection Starter Kit II, Roche, Basel, Switzerland). ULTRAhyb<sup>®</sup>-Oligo  
438 Hybridization Buffer (Ambion) was used to optimize the hybridization of probes to  
439 siRNAs in our Northern analysis. The software Image J was applied to do quantitative  
440 calculations of digital images of Northern blots.

441

#### 442 **qRT-PCR, semi-quantitative RT-PCR analysis**

443 The genomic DNA was removed from purified total RNA by RNase-free DNase I  
444 treatment before qRT-PCR and semi-quantitative RT-PCR (gDNA wiper, Vazyme). The  
445 cDNA was synthesized according to the manufacturer's protocol (HiScript<sup>®</sup> II Q RT  
446 SuperMix for qPCR (+gDNA wiper), Vazyme). qRT-PCR was used to measure the  
447 expression of NbP3IP using primers that are listed in supplementary table 1, and to  
448 confirm the silencing of ATGs using the primers described previously (Wang et al., 2013).  
449 The *N. benthamiana* Ubiquitin C (UBC) gene (Accession Number: AB026056.1) was  
450 used as the internal reference gene for analysis and the primers are listed in  
451 supplementary table 1 (Rotenberg et al., 2006; Shi et al., 2016). A Roche Light  
452 Cycler<sup>®</sup>480 Real-Time PCR System was used for the reaction and the results were  
453 analyzed by the  $\Delta\Delta C_T$  method. Semi-quantitative RT-PCR was used to measure the  
454 expression of p3-GFP and free GFP at 26 cycles using primers listed in supplementary  
455 table 1 (Peng et al., 2011).

456

#### 457 **Y2H, BiFC and analysis of subcellular localization**

458 The Matchmaker Yeast Two-Hybrid System 3 (Clontech) was used for yeast two-hybrid  
459 assays to examine the p3 interaction with NbP3IP. The experiments were performed as  
460 described previously (Shi et al., 2007). The vectors used in BiFC and subcellular  
461 localization assay experiments have been described previously (Lu et al., 2011; Yan et al.,  
462 2012). These assays were performed using laser scanning confocal microscopy as  
463 described previously (Jiang et al., 2014).

464

#### 465 **Co-immunoprecipitation (Co-IP) assay**

466 For Co-IP assays, the proteins under study were transiently expressed by agro-infiltration  
467 in *N. benthamiana* plants. At 3 dpi, leaf samples (8 discs) were extracted in ice-cold  
468 extraction buffer (GTEN buffer ( 10% glycerol, 25 mM Tris-HCl, pH 7.5, 1 mM EDTA,  
469 and 150 mM NaCl), 10 mM DTT, 1 mM PMSF, 0.15% Nonidet P40, and 1×protease  
470 inhibitor cocktail (Roche) (Wang et al., 2015). Leaf lysates were then mixed with  
471 anti-GFP mAb-Magnetic beads (MBL, Japan), mixed well and incubated with gentle  
472 agitation for an hour at room temperature. The beads were collected by magnet and rinsed  
473 3 times with washing buffer (GTEN butter, 1 mM PMSF and 1×protease inhibitor  
474 cocktail, freshly prepared), and then the bound complexes were eluted by boiling with  
475 protein loading buffer for 5 minutes. The samples were separated by SDS-PAGE in a  
476 12% polyacrylamide gel and detected using an anti-Myc antibody (Han et al., 2015).

477

#### 478 **Western blotting**

479 Total proteins of plant leaf samples were extracted with lysis buffer (100 mM Tris-HCl,  
480 pH 8.8, 60% SDS, 2% β-mercaptoethanol). Proteins were fractionated by 12%  
481 SDS-PAGE, transferred onto nitrocellulose membrane (Amersham, Germany), then  
482 detected using anti-GFP polyclonal primary antiserum and alkaline  
483 phosphatase-conjugated anti-mouse (TransGen) secondary antibody. The  
484 antigen–antibody complexes were visualized using nitroterazolium blue

485 chloride/5-bromo-4-chloro-3-indolyl phosphate (NBT/BCIP) buffer (Sigma-Aldrich, St.  
486 Louis, Missouri, USA) under standard conditions. Image J software was used to do  
487 quantitative calculations of digital images of Western blots.

488

#### 489 **Leaf chemical treatment, confocal microscopy and TEM**

490 Phosphate-buffered saline containing 2% dimethyl sulfoxide (DMSO, as control) or an  
491 equal volume of DMSO with 100  $\mu$ M MG132 (Sigma) for inhibition of the 26S  
492 proteasome, or H<sub>2</sub>O as a control and an equal volume of H<sub>2</sub>O containing 10 mM 3-MA  
493 (Sigma) for inhibition of autophagy, was infiltrated into leaves 16 h before samples were  
494 collected. Confocal imaging was performed as described (Jiang et al., 2014).  
495 Alternatively, the leaves were agroinfiltrated with the autophagy marker CFP-NbATG8f  
496 for a 60 h expression period, followed by additional infiltration with 20  $\mu$ M E-64d  
497 (Sigma) for an 8 h period. A Leica TCS SP5 (Leica Microsystems, Bannockburn, IL,  
498 USA) confocal laser scanning microscope was used to examine the fluorescence of CFP  
499 with an excitation light of 405 nm, and the emission was captured at 454 to 581 nm.

500 For TEM observations, the 20  $\mu$ M E-64d-treated leaves were cut into small pieces  
501 ( $2 \times 2$  mm<sup>2</sup>). The treatments and the examination of the sampled tissues were performed as  
502 described before (Li et al., 2017).

503

#### 504 **ACKNOWLEDGEMENTS**

505 This work was supported by the State Basic Research Program of China  
506 (2014CB138403), the national key research and development program of China  
507 (2017YFA0503401), the National Natural Science Foundation of China (31772239), the  
508 Major Project of New Varieties of Genetically Modified Organism of China  
509 (2016ZX08001-002), the Rural & Environment Science & Analytical Services Division  
510 of the Scottish Government, the International Science & Technology Cooperation  
511 Program of China (2015DFA30700) and the K.C.Wong Magna Fund of Ningbo

512 University.

513

## 514 **AUTHOR CONTRIBUTIONS**

515 L.L.J., Y.W.L., X.Y.Z., F.Y., Y.L. and J.C. designed experiments and analyzed data. L.L.J.,  
516 Y.W.L., X.Y.Z., X.Y., Y.C., T.Z., XING Z., S.W., X.Z., X.X.Z., J.P., H.Z. and L.L.  
517 performed the experiments. L.L.J., Y.W.L., X.Y.Z., F.Y., Y.L. and J.C. prepared the  
518 figures. X.S. provided the help with TEM experiment. S.M.F. provided constructive  
519 comments and help with writing. L.L.J., Y.W.L., X.Y.Z., F.Y., Y.L. and J.C. wrote the  
520 paper.

521

## 522 **REFERENCES**

- 523 **Avin-Wittenberg, T.** (2018). Autophagy and its role in plant abiotic stress management. *Plant Cell*  
524 *Environ.*
- 525 **Bassham, D.C.** (2007). Plant autophagy--more than a starvation response. *Curr Opin Plant Biol* **10**,  
526 587-593.
- 527 **Birgisdottir, A.B., Lamark, T., and Johansen, T.** (2013). The LIR motif - crucial for selective autophagy.  
528 *J Cell Sci* **126**, 3237-3247.
- 529 **Bozhkov, P.V.** (2018). Plant autophagy: mechanisms and functions. *J Exp Bot* **69**, 1281-1285.
- 530 **Canto, T., Uhrig, J.F., Swanson, M., Wright, K.M., and MacFarlane, S.A.** (2006). Translocation of  
531 Tomato bushy stunt virus P19 protein into the nucleus by ALY proteins compromises its silencing  
532 suppressor activity. *J Virol* **80**, 9064-9072.
- 533 **Chang, C., Su, H., Zhang, D., Wang, Y., Shen, Q., Liu, B., Huang, R., Zhou, T., Peng, C., Wong, C.C.,**  
534 **Shen, H.M., Lippincott-Schwartz, J., and Liu, W.** (2015). AMPK-Dependent Phosphorylation  
535 of GAPDH Triggers Sirt1 Activation and Is Necessary for Autophagy upon Glucose Starvation.  
536 *Mol Cell* **60**, 930-940.
- 537 **Chen, L., Yan, Z., Xia, Z., Cheng, Y., Jiao, Z., Sun, B., Zhou, T., and Fan, Z.** (2017). A Violaxanthin  
538 Deepoxidase Interacts with a Viral Suppressor of RNA Silencing to Inhibit Virus Amplification.  
539 *Plant Physiol* **175**, 1774-1794.
- 540 **Cheng, Y.Q., Liu, Z.M., Xu, J., Zhou, T., Wang, M., Chen, Y.T., Li, H.F., and Fan, Z.F.** (2008). HC-Pro  
541 protein of sugar cane mosaic virus interacts specifically with maize ferredoxin-5 in vitro and in  
542 planta. *J Gen Virol* **89**, 2046-2054.
- 543 **Du, Z., Xiao, D., Wu, J., Jia, D., Yuan, Z., Liu, Y., Hu, L., Han, Z., Wei, T., Lin, Q., Wu, Z., and Xie, L.**  
544 (2011). p2 of rice stripe virus (RSV) interacts with OsSGS3 and is a silencing suppressor. *Mol*  
545 *Plant Pathol* **12**, 808-814.
- 546 **Fu, S., Xu, Y., Li, C., Li, Y., Wu, J., and Zhou, X.** (2018). Rice Stripe Virus Interferes with S-acylation of

- 547 Remorin and Induces Its Autophagic Degradation to Facilitate Virus Infection. *Mol Plant* **11**,  
548 269-287.
- 549 **Guo, W., Wu, G., Yan, F., Lu, Y., Zheng, H., Lin, L., Chen, H., and Chen, J.** (2012). Identification of  
550 novel *Oryza sativa* miRNAs in deep sequencing-based small RNA libraries of rice infected with  
551 Rice stripe virus. *PLoS One* **7**, e46443.
- 552 **Hafren, A., Macia, J.L., Love, A.J., Milner, J.J., Drucker, M., and Hofius, D.** (2017). Selective  
553 autophagy limits cauliflower mosaic virus infection by NBR1-mediated targeting of viral capsid  
554 protein and particles. *Proc Natl Acad Sci U S A* **114**, E2026-E2035.
- 555 **Hafren, A., Ustun, S., Hochmuth, A., Svenning, S., Johansen, T., and Hofius, D.** (2018). Turnip Mosaic  
556 Virus Counteracts Selective Autophagy of the Viral Silencing Suppressor HCpro. *Plant Physiol*  
557 **176**, 649-662.
- 558 **Hamamatsu, C., Toriyama, S., Toyoda, T., and Ishihama, A.** (1993). Ambisense coding strategy of the  
559 rice stripe virus genome: in vitro translation studies. *J Gen Virol* **74** ( Pt 6), 1125-1131.
- 560 **Han, S., Yu, B., Wang, Y., and Liu, Y.** (2011). Role of plant autophagy in stress response. *Protein Cell* **2**,  
561 784-791.
- 562 **Han, S., Wang, Y., Zheng, X., Jia, Q., Zhao, J., Bai, F., Hong, Y., and Liu, Y.** (2015). Cytoplasmic  
563 Glyceraldehyde-3-Phosphate Dehydrogenases Interact with ATG3 to Negatively Regulate  
564 Autophagy and Immunity in *Nicotiana benthamiana*. *Plant Cell* **27**, 1316-1331.
- 565 **Haxim, Y., Ismayil, A., Jia, Q., Wang, Y., Zheng, X., Chen, T., Qian, L., Liu, N., Wang, Y., Han, S.,  
566 Cheng, J., Qi, Y., Hong, Y., and Liu, Y.** (2017). Autophagy functions as an antiviral mechanism  
567 against geminiviruses in plants. *Elife* **6**.
- 568 **Hayward, A.P., and Dinesh-Kumar, S.P.** (2011). What can plant autophagy do for an innate immune  
569 response? *Annu Rev Phytopathol* **49**, 557-576.
- 570 **Hofius, D., Li, L., Hafren, A., and Coll, N.S.** (2017). Autophagy as an emerging arena for plant-pathogen  
571 interactions. *Curr Opin Plant Biol* **38**, 117-123.
- 572 **Horsch RB, F.J., Hoffmann NL, Wallroth M, Eicholtz D, Rogers SG, Fraley RT.** (1985). A simple and  
573 general method for transferring genes into plants. *Science* **227**, 1229-1231.
- 574 **Huang, R., and Liu, W.** (2015). Identifying an essential role of nuclear LC3 for autophagy. *Autophagy* **11**,  
575 852-853.
- 576 **Jiang, S., Lu, Y., Li, K., Lin, L., Zheng, H., Yan, F., and Chen, J.** (2014). Heat shock protein 70 is  
577 necessary for Rice stripe virus infection in plants. *Mol Plant Pathol* **15**, 907-917.
- 578 **Kabeya, Y., Mizushima, N., Ueno, T., Yamamoto, A., Kirisako, T., Noda, T., Kominami, E., Ohsumi,  
579 Y., and Yoshimori, T.** (2000). LC3, a mammalian homologue of yeast Apg8p, is localized in  
580 autophagosome membranes after processing. *EMBO J* **19**, 5720-5728.
- 581 **Kim, H., Cho, W.K., Lian, S., and Kim, K.H.** (2017). Identification of residues or motif(s) of the rice  
582 stripe virus NS3 protein required for self-interaction and for silencing suppressor activity. *Virus*  
583 *research* **235**, 14-23.
- 584 **Kong, L., Wu, J., Lu, L., Xu, Y., and Zhou, X.** (2013). Interaction between Rice stripe virus  
585 disease-specific protein and host PsbP enhances virus symptoms. *Molecular plant*.
- 586 **Li, F., Zhang, C., Li, Y., Wu, G., Hou, X., Zhou, X., and Wang, A.** (2018). Beclin1 restricts RNA virus  
587 infection in plants through suppression and degradation of the viral polymerase. *Nat Commun* **9**,

- 588 1268.
- 589 **Li, F., Zhao, N., Li, Z., Xu, X., Wang, Y., Yang, X., Liu, S.S., Wang, A., and Zhou, X.** (2017). A  
590 calmodulin-like protein suppresses RNA silencing and promotes geminivirus infection by  
591 degrading SGS3 via the autophagy pathway in *Nicotiana benthamiana*. *Plos Pathogens* **13**,  
592 e1006213.
- 593 **Liu, Y., Xiong, Y., and Bassham, D.C.** (2009). Autophagy is required for tolerance of drought and salt  
594 stress in plants. *Autophagy* **5**, 954-963.
- 595 **Lu, Y., Yan, F., Guo, W., Zheng, H., Lin, L., Peng, J., Adams, M.J., and Chen, J.** (2011). Garlic virus X  
596 11-kDa protein granules move within the cytoplasm and traffic a host protein normally found in  
597 the nucleolus. *Mol Plant Pathol* **12**, 666-676.
- 598 **Nakagawa, T., Kurose, T., Hino, T., Tanaka, K., Kawamukai, M., Niwa, Y., Toyooka, K., Matsuoka,**  
599 **K., Jinbo, T., and Kimura, T.** (2007). Development of series of gateway binary vectors, pGWBs,  
600 for realizing efficient construction of fusion genes for plant transformation. *J Biosci Bioeng* **104**,  
601 34-41.
- 602 **Nakahara, K.S., Masuta, C., Yamada, S., Shimura, H., Kashihara, Y., Wada, T.S., Meguro, A., Goto,**  
603 **K., Tadamura, K., Sueda, K., Sekiguchi, T., Shao, J., Itchoda, N., Matsumura, T., Igarashi,**  
604 **M., Ito, K., Carthew, R.W., and Uyeda, I.** (2012). Tobacco calmodulin-like protein provides  
605 secondary defense by binding to and directing degradation of virus RNA silencing suppressors.  
606 *Proc Natl Acad Sci U S A* **109**, 10113-10118.
- 607 **Nakatogawa, H., Ichimura, Y., and Ohsumi, Y.** (2007). Atg8, a ubiquitin-like protein required for  
608 autophagosome formation, mediates membrane tethering and hemifusion. *Cell* **130**, 165-178.
- 609 **Pall, G.S., Codony-Servat, C., Byrne, J., Ritchie, L., and Hamilton, A.** (2007). Carbodiimide-mediated  
610 cross-linking of RNA to nylon membranes improves the detection of siRNA, miRNA and piRNA  
611 by northern blot. *Nucleic Acids Res* **35**, e60.
- 612 **Peng, J., Yang, J., Yan, F., Lu, Y., Jiang, S., Lin, L., Zheng, H., Chen, H., and Chen, J.** (2011).  
613 Silencing of NbXrn4 facilitates the systemic infection of Tobacco mosaic virus in *Nicotiana*  
614 *benthamiana*. *Virus Res* **158**, 268-270.
- 615 **Perez-Perez, M.E., Florencio, F.J., and Crespo, J.L.** (2010). Inhibition of target of rapamycin signaling  
616 and stress activate autophagy in *Chlamydomonas reinhardtii*. *Plant Physiol* **152**, 1874-1888.
- 617 **Qu, Z., Liang, D., Harper, G., and Hull, R.** (1997). Comparison of sequences of RNAs 3 and 4 of rice  
618 stripe virus from China with those of Japanese isolates. *Virus Genes* **15**, 99-103.
- 619 **Rotenberg, D., Thompson, T.S., German, T.L., and Willis, D.K.** (2006). Methods for effective real-time  
620 RT-PCR analysis of virus-induced gene silencing. *J Virol Methods* **138**, 49-59.
- 621 **Seglen, P.O., and Gordon, P.B.** (1982). 3-Methyladenine: specific inhibitor of autophagic/lysosomal  
622 protein degradation in isolated rat hepatocytes. *Proc Natl Acad Sci U S A* **79**, 1889-1892.
- 623 **Shi, B., Lin, L., Wang, S., Guo, Q., Zhou, H., Rong, L., Li, J., Peng, J., Lu, Y., Zheng, H., Yang, Y.,**  
624 **Chen, Z., Zhao, J., Jiang, T., Song, B., Chen, J., and Yan, F.** (2016). Identification and  
625 regulation of host genes related to Rice stripe virus symptom production. *New Phytol* **209**,  
626 1106-1119.
- 627 **Shi, Y., Chen, J., Hong, X., Chen, J., and Adams, M.J.** (2007). A potyvirus P1 protein interacts with the  
628 Rieske Fe/S protein of its host. *Mol Plant Pathol* **8**, 785-790.

- 629 **Takahashi, M., Toriyama, S., Hamamatsu, C., and Ishihama, A.** (1993). Nucleotide sequence and  
630 possible ambisense coding strategy of rice stripe virus RNA segment 2. *J Gen Virol* **74** ( Pt 4),  
631 769-773.
- 632 **Tanida, I., Minematsu-Ikeguchi, N., Ueno, T., and Kominami, E.** (2005). Lysosomal turnover, but not a  
633 cellular level, of endogenous LC3 is a marker for autophagy. *Autophagy* **1**, 84-91.
- 634 **Wang, Y., Zheng, X., Yu, B., Han, S., Guo, J., Tang, H., Yu, A.Y., Deng, H., Hong, Y., and Liu, Y.**  
635 (2015). Disruption of microtubules in plants suppresses macroautophagy and triggers starch  
636 excess-associated chloroplast autophagy. *Autophagy* **11**, 2259-2274.
- 637 **Wang, Y., Yu, B., Zhao, J., Guo, J., Li, Y., Han, S., Huang, L., Du, Y., Hong, Y., Tang, D., and Liu, Y.**  
638 (2013). Autophagy contributes to leaf starch degradation. *Plant Cell* **25**, 1383-1399.
- 639 **Wu, G., Lu, Y., Zheng, H., Lin, L., Yan, F., and Chen, J.** (2013). Transcription of ORFs on RNA2 and  
640 RNA4 of Rice stripe virus terminate at an AUCCGGAU sequence that is conserved in the genus  
641 Tenuivirus. *Virus Res* **175**, 71-77.
- 642 **Xie, Z., Nair, U., and Klionsky, D.J.** (2008). Atg8 controls phagophore expansion during autophagosome  
643 formation. *Mol Biol Cell* **19**, 3290-3298.
- 644 **Xiong, R., Wu, J., Zhou, Y., and Zhou, X.** (2008). Identification of a movement protein of the tenuivirus  
645 rice stripe virus. *J Virol* **82**, 12304-12311.
- 646 **Xiong, R., Wu, J., Zhou, Y., and Zhou, X.** (2009). Characterization and subcellular localization of an  
647 RNA silencing suppressor encoded by Rice stripe tenuivirus. *Virology* **387**, 29-40.
- 648 **Yan, F., Lu, Y., Lin, L., Zheng, H., and Chen, J.** (2012). The ability of PVX p25 to form RL structures in  
649 plant cells is necessary for its function in movement, but not for its suppression of RNA silencing.  
650 *PLoS One* **7**, e43242.
- 651 **Yang, M., Zhang, Y., Xie, X., Yue, N., Li, J., Wang, X.B., Han, C., Yu, J., Liu, Y., and Li, D.** (2018).  
652 Barley stripe mosaic virus gammab Protein Subverts Autophagy to Promote Viral Infection by  
653 Disrupting the ATG7-ATG8 Interaction. *Plant Cell* **30**, 1582-1595.
- 654 **Yi, C., Ma, M., Ran, L., Zheng, J., Tong, J., Zhu, J., Ma, C., Sun, Y., Zhang, S., Feng, W., Zhu, L., Le,  
655 Y., Gong, X., Yan, X., Hong, B., Jiang, F.J., Xie, Z., Miao, D., Deng, H., and Yu, L.** (2012).  
656 Function and molecular mechanism of acetylation in autophagy regulation. *Science* **336**, 474-477.
- 657 **Yoshimoto, K., Hanaoka, H., Sato, S., Kato, T., Tabata, S., Noda, T., and Ohsumi, Y.** (2004).  
658 Processing of ATG8s, ubiquitin-like proteins, and their deconjugation by ATG4s are essential for  
659 plant autophagy. *Plant Cell* **16**, 2967-2983.
- 660 **Yoshimoto, K., Jikumar, Y., Kamiya, Y., Kusano, M., Consonni, C., Panstruga, R., Ohsumi, Y., and  
661 Shirasu, K.** (2009). Autophagy negatively regulates cell death by controlling NPR1-dependent  
662 salicylic acid signaling during senescence and the innate immune response in Arabidopsis. *Plant  
663 Cell* **21**, 2914-2927.
- 664 **Yuan, Z., Chen, H., Chen, Q., Omura, T., Xie, L., Wu, Z., and Wei, T.** (2011). The early secretory  
665 pathway and an actin-myosin VIII motility system are required for plasmodesmatal localization of  
666 the NSvc4 protein of Rice stripe virus. *Virus Res* **159**, 62-68.
- 667 **Zhai, Y., Guo, M., Wang, H., Lu, J., Liu, J., Zhang, C., Gong, Z., and Lu, M.** (2016). Autophagy, a  
668 Conserved Mechanism for Protein Degradation, Responds to Heat, and Other Abiotic Stresses in  
669 *Capsicum annuum* L. *Front Plant Sci* **7**, 131.

- 670 **Zhang, C., Pei, X., Wang, Z., Jia, S., Guo, S., Zhang, Y., and Li, W.** (2012). The Rice stripe virus pc4  
671 functions in movement and foliar necrosis expression in *Nicotiana benthamiana*. *Virology* **425**,  
672 113-121.
- 673 **Zhao, S., Zhang, G., Dai, X., Hou, Y., Li, M., Liang, J., and Liang, C.** (2012). Processing and  
674 intracellular localization of rice stripe virus Pc2 protein in insect cells. *Virology* **429**, 148-154.
- 675 **Zhu, J.K.** (2016). Abiotic Stress Signaling and Responses in Plants. *Cell* **167**, 313-324.
- 676 **Zhu, Y., Hayakawa, T., and Toriyama, S.** (1992). Complete nucleotide sequence of RNA 4 of rice stripe  
677 virus isolate T, and comparison with another isolate and with maize stripe virus. *J Gen Virol* **73**  
678 ( Pt 5), 1309-1312.
- 679 **Zhu, Y., Hayakawa, T., Toriyama, S., and Takahashi, M.** (1991). Complete nucleotide sequence of RNA  
680 3 of rice stripe virus: an ambisense coding strategy. *J Gen Virol* **72** ( Pt 4), 763-767.

681

## 682 **FIGURE LEGENDS**

### 683 **Fig.1 NbP3IP interacts with RSV p3.**

684 (A) Yeast two-hybrid assay demonstrates interaction between NbP3IP and p3. NbP3IP  
685 was fused with the GAL4 binding domain (pGBK-NbP3IP) and p3 was fused with the  
686 GAL4 activation domain (pGAD-p3). Yeast co-transformed with pGBK-53 + pGAD-T  
687 served as a positive control, and yeast co-transformed with vectors pGBK-Lam +  
688 pGAD-T, pGBK-NbP3IP + pGAD-T or pGBK-Lam + pGAD-p3 served as negative  
689 controls. Serial 10-fold dilutions of co-transformed yeast cells were plated on synthetic  
690 defined (SD) medium lacking tryptophan, leucine, histidine and adenine and colony  
691 growth indicated interaction between the paired proteins.

692 (B) BiFC assay demonstrating interaction between NbP3IP and p3 in the leaves of *N.*  
693 *benthamiana* at 60 hours post infiltration (hpi). The N- or C-terminal fragments of YFP  
694 were fused to the N-terminus of NbP3IP and p3. The GUS protein was used as a  
695 non-interacting, negative control. Bars, 50  $\mu$ m.

696 (C) Co-immunoprecipitation (Co-IP) analysis of NbP3IP-eGFP and p3-Myc expressed in  
697 *N. benthamiana* leaves by agroinfiltration. Separate expression of NbP3IP-eGFP and  
698 p3-Myc, and co-expression of NbP3IP-eGFP and pc3-Myc were used as negative  
699 controls.

700 (D) A schematic diagram of the wild-type p3 protein and 8 truncated p3 constructs (F1 to



701 F8). The mutations include a NLS deletion mutant (F1), a C-terminal deletion mutant  
702 (F2), an N-terminal deletion mutant (F3), 1-36 aa of p3 (F4), 173-211 aa of p3 (F5),  
703 37-177 aa of p3 (F6), 21-177 aa of p3 (F7), 21-190 aa of p3 (F8). H1 to H4 represent four  
704 helical regions.

705 (E) BiFC assays between NbP3IP and each of the 8 mutants of p3 in leaves of *N.*  
706 *benthamiana* at 60 hpi. Bars, 50  $\mu$ m.

707

708 **Fig.2 The expression of NbP3IP inhibits the local silencing suppression activity of**  
709 **RSV p3.**

710 (A) Expression of pBIN-GFP promotes RNA silencing of the GFP gene in line 16c plants  
711 (top, right patch) but co-expression with p3-Myc suppresses RNA silencing and promotes  
712 GFP expression (top, left patch). The expression of NbP3IP-Myc or GUSp-Myc (1-166  
713 aa of GUS) did not suppress RNA silencing initiated by pBIN-GFP (bottom patches, left  
714 and right). The plants were photographed under UV light at 5 dpi.

715 (B) The accumulation of GFP in the infiltrated patches was detected by western blotting.  
716 The expression of p3-Myc, NbP3IP-Myc and GUSp-Myc protein were detected by  
717 western blotting with an anti-Myc antibody. The GFP protein levels were normalized to  
718 rubisco, and the level in each patch calculated in relation to the p3-Myc sample.

719 (C) The silencing suppression activity of p3 was inhibited by the co-expression of  
720 NbP3IP in pBIN-GFP-infiltrated 16c transgenic plants (right side), whereas,  
721 co-expression of GUSp-Myc with pBIN-GFP did not affect p3-mediated silencing  
722 suppression (left side). The plants were photographed under UV light at 5 dpi.

723 (D) The accumulations of GFP protein, GFP mRNA and GFP siRNAs were detected by  
724 western blot and northern blot. The expression of GUSp-Myc and NbP3IP-Myc protein  
725 were detected by western blot with Myc antibody. The GFP protein levels were  
726 normalized to rubisco, and the relative levels calculated in relation to the GUSp-Myc  
727 sample. The GFP mRNA and siRNA levels were normalized to rRNA, and the relative

728 levels calculated in relation to the GUSp-Myc sample.

729 **Fig.3 NbP3IP mediates the degradation of p3 via the autophagy pathway.**

730 (A) Protein accumulation analysis of p3-GFP (empty RFP as an expressing reference)  
731 co-expressed with NbP3IP or GUSp. p3-GFP fluorescence was detected by confocal  
732 microscopy at 60 hpi. Bars, 20  $\mu$ m. The accumulation of the p3 protein was analyzed by  
733 western blotting with an anti-GFP antibody. The level of p3-GFP co-expressed with  
734 GUSp was normalized to rubisco, and used as the reference for relative expression  
735 calculations. Semi-quantitative RT-PCR was used for analysis of p3-GFP transcripts.  
736 Actin served as an internal amplification standard. The accumulation of RFP was detected  
737 by western blotting with anti-RFP antibody. The level of RFP was normalized to rubisco.  
738 (B) The autophagy inhibitor 3-MA reduces NbP3IP-mediated degradation of p3-GFP.  
739 p3-GFP and NbP3IP-Myc were co-expressed in *N. benthamiana* leaves for 48 h, followed  
740 by a H<sub>2</sub>O or 10 mM 3-MA treatment for 16 h. The value represents protein accumulation  
741 relative to rubisco, and the relative levels were calculated in relation to the H<sub>2</sub>O  
742 treatment.

743 (C) The 26S Proteasome inhibitor MG132 has no effect on the NbP3IP-mediated  
744 degradation of p3-GFP. Co-expressed p3-GFP and NbP3IP-Myc in *N. benthamiana*  
745 leaves for 48 h, followed by DMSO or MG132 treatment for 16 h. The value represents  
746 protein accumulation relative to rubisco, and the relative levels were calculated in relation  
747 to the DMSO treatment.

748 (D) Silencing of *NbATG5* inhibited NbP3IP-mediated degradation of p3. Confocal  
749 micrographs show cells co-expressing p3-GFP and NbP3IP-Myc in plants with *NbATG5*  
750 silencing (TRV:ATG5) or with a non-silenced control (TRV:00) at 60 hpi. Bars, 25  $\mu$ m.  
751 The accumulation of NbP3IP-Myc and p3-GFP were analyzed by western blotting. The  
752 value represents protein accumulation relative to rubisco, and the relative levels were  
753 calculated in relation to the TRV:00 treatment.

754 (E) Silencing of *NbATG7* inhibited NbP3IP-mediated degradation of p3. Confocal

755 micrographs shows cells co-expressing p3-GFP and NbP3IP-Myc in plants with *NbATG7*  
756 silencing (TRV:ATG7) or with a non-silenced control (TRV:00) at 60 hpi. Bars, 25  $\mu$ m.  
757 Protein analysis was done as for panel D.

758 (F) The NbP3IP and p3 interaction complex co-localized with CFP-NbATG8f in *N.*  
759 *benthamiana* leaf epidermal cells. Confocal imaging was done at 60 hpi. Yellow  
760 fluorescence indicates co-localized interaction of NbP3IP and p3. Cyan fluorescence  
761 indicates the location of NbATG8f. Typical autophagic structures (cyan; red arrows) and  
762 the NbP3IP-p3 complex (yellow; red arrows) were observed to co-localize in the  
763 cytoplasm. Bars, 25  $\mu$ m.

764

765 **Fig.4 Degradation of p3 via autophagy depends on its interaction with NbP3IP.**

766 (A) Activating autophagy by GAPCs silencing has no effect on the accumulation of p3  
767 when expressed alone. Confocal micrographs show cells expressing p3-GFP in plants  
768 with *GAPCs* silencing (TRV:GAPCs) or a non-silenced control (TRV:00) at 60 hpi. Bars,  
769 25  $\mu$ m. Western blot shows the accumulation of p3-GFP in these plants.

770 (B) Analysis of p3 accumulation in *GAPCs* silenced plants or non-silenced plants when  
771 co-expressed with NbP3IP. Confocal micrographs shows cells co-expressing p3-GFP and  
772 NbP3IP-Myc in *GAPCs* silenced (TRV:GAPCs) or non-silenced control (TRV:00) plants  
773 at 60 hpi. Bars, 25  $\mu$ m. Western blot shows the accumulation of p3-GFP and  
774 NbP3IP-Myc in these plants.

775 (C) The p3 deletion mutant F8 that does not interact with NbP3IP is not degraded by the  
776 autophagy pathway. Confocal micrographs shows cells co-expressing F8-GFP and  
777 NbP3IP-Myc in plants with *GAPCs* silencing (TRV:GAPCs) or a non-silenced control  
778 (TRV:00) at 60 hpi. Bars, 25  $\mu$ m. Western blot shows the accumulation of p3-GFP and  
779 NbP3IP-Myc in these plants.

780

781 **Fig. 5 NbP3IP mediates p3 degradation by interacting with NbATG8f.**

782 (A) BiFC assay demonstrates interaction between NbP3IP and NbATG8f (upper left  
783 panel) and between p3 and C-terminal S2 fragment of NbP3IP (lower left panel). No  
784 interaction detected between RSV p3 and NbATG8f (upper right panel) or between  
785 NbP3IP S2 fragment and NbATG8f (lower right panel). Bars, 25µm.

786 (B) Co-IP analysis of GFP-NbATG8f and NbP3IP-Myc expressed in *N. benthamiana*  
787 leaves by agroinfiltration. NbP3IP-Myc is precipitated only when in the presence of  
788 NbATG8f.

789 (C) The diagram shows the two truncated mutants of NbP3IP used in this work.

790 (D) Yeast two-hybrid assays to show interaction between NbP3IP-S2 and RSV p3 but not  
791 between NbP3IP-S1 and RSV p3. BK-53 and AD-T are known to interact, whereas  
792 BK-Lam and AD-T do not interact. Serial 10-fold dilutions of yeast cells were plated on  
793 synthetic defined (SD)/-Trp, -Leu, -His, -Ade medium.

794 (E) Co-IP analysis shows that GFP-NbATG8f interacts with NbP3IP-Myc but not  
795 NbPIP-S2-Myc. GUSp-Myc is used as a non-interacting control protein.

796 (F) Suppression of pBIN-GFP-induced silencing of GFP by co-expression of p3 is not  
797 inhibited by NbPIP-S2-Myc. GUSp-Myc was used as a non-inhibiting control. The plants  
798 were photographed under UV light at 5 dpi. The accumulations of GFP protein and  
799 mRNA were detected by western blot and northern blot. The accumulation of  
800 GFP-derived siRNA was analyzed in small RNA northern blot assay. The expression of  
801 GUSp-Myc and NbP3IP-Myc protein were detected by western blot with Myc antibody.  
802 The accumulations of GFP protein, GFP mRNA and GFP siRNAs were detected by  
803 western blot and northern blot. The expression of GUSp-Myc and NbP3IP-S2-Myc  
804 protein were detected by western blot with Myc antibody. The GFP and Myc-tagged  
805 protein levels were normalized to rubisco, and the relative levels calculated in relation to  
806 the GUSp-Myc sample. The GFP mRNA and siRNA levels were normalized to rRNA,  
807 and the relative levels calculated in relation to the GUSp-Myc sample

808

809 **Fig.6 RSV infection induces autophagy and is negatively affected by autophagy.**

810 (A) Expression of *ATGs* is up-regulated after RSV infection. Relative quantification of  
811 mRNA levels of autophagy-related genes (*ATGs*) in RSV infected plants at 0, 9, 20, 25  
812 dpi. Values represent means  $\pm$  SD from three independent experiments. Single asterisk  
813 indicates  $P < 0.05$ , double asterisks indicate  $P < 0.01$  of significant difference between RSV  
814 infected 0 day plants and other plants (Student's *t*-test, two-sided).

815 (B) Confocal micrographs showing *N. benthamiana* leaf cells, infected with RSV at 20  
816 dpi, expressing CFP-NbATG8f at 60 hpi. Autophagosomes and autophagic bodies are  
817 revealed as CFP positive puncta in mesophyll cells. Chloroplast autofluorescence is in  
818 red. Bars, 10  $\mu$ m. Relative autophagic activity in RSV infected plants compared to mock  
819 inoculated plants. Autophagic bodies were counted from approximately 150 cells for  
820 each treatment in three independent experiments. Values represent the means  $\pm$  SD.  
821 Double asterisks indicate  $P < 0.01$  of significant difference between control plants and  
822 RSV infected plants (Student's *t*-test, two-sided).

823 (C) Silencing of *GAPCs* reduces RSV accumulation level. Viral symptoms in RSV  
824 infected control plants (TRV:00) and *GAPCs*-silenced plants (TRV:*GAPCs*). Plants were  
825 photographed under normal light at 25 dpi of RSV infection.

826 (D) Relative levels of RSV CP RNA and protein in RSV infected *GAPCs*-silenced and  
827 control plants at 25 dpi, as detected by northern and western blotting, respectively. The  
828 RSV CP RNA and CP levels were normalized in relation to rRNA and rubisco,  
829 respectively, and the relative levels calculated in relation to the leftmost TRV:00 sample.

830 (E) Silencing of *ATG7* increases RSV accumulation level. Viral symptoms in RSV  
831 infected control plants (TRV:00) and *ATG7*-silenced plants (TRV:*ATG7*). Plants were  
832 photographed under normal light at 25 dpi of RSV infection.

833 (F) Relative levels of RSV RNA and CP in RSV infected *ATG7*-silenced and control  
834 plants at 25 dpi, as detected by Northern and Western blotting, respectively. The RSV CP  
835 RNA and CP levels were normalized in relation to rRNA and rubisco, respectively, and

836 the relative levels calculated in relation to the leftmost TRV:00 sample.

837

838 **Fig.7 NbP3IP overexpression activates autophagy.**

839 (A) Co-expression of NbP3IP-Myc with CFP-NbATG8f increases the appearance of  
840 autophagosomes and autophagic vesicles compared to expression of CFP-NbATG8f with  
841 a control protein (GUSp-Myc). Images were collected at 60 hpi. Bars, 25  $\mu$ m.

842 (B) Quantification of increase in autophagic activity in cells imaged in panel A. The  
843 autophagic activity was calculated in relation to GUSp-Myc-treated plants. Autophagic  
844 bodies were counted from approximately 150 cells for each treatment in three  
845 independent experiments. Values represent the mean  $\pm$  SD. Double asterisks indicates  
846  $P < 0.01$  of significant difference between GUSp-Myc and NbP3IP-Myc treatments  
847 (Student's *t*-test, two-sided).

848 (C) Examination of autophagic vesicle production by TEM of leaf cells from plants  
849 infiltrated with GUSp-Myc or NbP3IP-Myc. Samples collected for processing at 60 hpi.  
850 Typical autophagic structures are indicated with red arrows. Bars, 1  $\mu$ m.

851 (D) Quantification of autophagic vesicles from approximately 20 cells present in TEM  
852 images. The autophagic activity is calculated relative to GUSp-Myc-treated plants. The  
853 value represents the mean  $\pm$  SD from three independent experiments. Double asterisks  
854 indicates  $P < 0.01$  of significant difference between GUSp-Myc and NbP3IP-Myc  
855 treatments (Student's *t*-test, two-sided).

856 (E) Silencing of the endogenous *NbP3IP* gene reduces the number of autophagosomes.  
857 Confocal images showing *NbP3IP*-silenced (TRV:NbP3IP) or control (TRV:00) plants  
858 transiently expressing CFP-NbATG8f at 60 hpi.

859 (F) Relative autophagic activity in *NbP3IP*-silenced plants. The autophagic activity was  
860 calculated in comparison to TRV:00 plants. Values represent the mean  $\pm$  SD from three  
861 independent experiments. Approximately 150 cells were used to quantify autophagic  
862 structures in each treatment. Three asterisks indicates  $P < 0.001$  of significant difference

863 between TRV:00 and TRV:NbP3IP treatments (Student's *t*-test, two-sided).

864

865 **Fig.8 Overexpression of NbP3IP reduces RSV accumulation in infected plants.**

866 (A) Expression level of *NbP3IP* in three different transgenic lines (NbP3IP-1, NbP3IP-2  
867 and NbP3IP-3) was analyzed by qRT-PCR with primers listed in supplementary table 1.  
868 Values represent means  $\pm$  SD from three independent experiments. Double asterisks  
869 indicate  $P < 0.01$  of significant difference between wild-type (WT) plants and NbP3IP  
870 overexpressed transgenic plants (Student's *t*-test, two-sided).

871 (B) The expression of ATGs are up-regulated in *NbP3IP* overexpressing transgenic plants.  
872 Relative expression of ATGs was monitored by qRT-PCR with primers listed in the  
873 supplementary table 1. Values represent means  $\pm$  SD from three independent experiments.  
874 Double asterisks indicate  $P < 0.01$  of significant difference between WT plants and  
875 NbP3IP-1 plants (Student's *t*-test, two-sided).

876 (C) Overexpression of NbP3IP in transgenic plants alleviates RSV infection. Viral  
877 symptoms in plants 15 days post inoculation with RSV.

878 (D) Time-course analysis of RSV infection. Fifteen individual plants each of WT,  
879 NbP3IP-1, NbP3IP-2 and NbP3IP-3 transgenic lines were inoculated with RSV and  
880 examined daily for appearance of viral symptoms in systemic leaves. Values represent  
881 means  $\pm$  SD from three independent experiments.

882 (E) RSV CP RNA and protein accumulation levels in systemically infected leaves (15 dpi)  
883 of WT and NbP3IP-transgenic lines detected by Northern and Western blotting. The value  
884 represents RSV CP RNA and protein accumulation normalized to rRNA and rubisco  
885 levels, respectively, and expressed relative to the WT plant.

886

887 **Fig.9 Working model for the role of NbP3IP in stimulating autophagy to resist RSV**  
888 **infection**

889 As the RNA silencing suppressor protein of RSV, p3 is produced in RSV infected plants,

890 however, the infection of RSV also induces the expression of NbP3IP, which interacts  
891 with p3 to activate autophagy. NbP3IP interacts with p3 and carries p3 to the  
892 autophagosome by cooperating with NbAtg8f that is a key factor in autophagy. The  
893 removal of p3 via the autophagy pathway enhances the activity of the plant RNA  
894 silencing system in targeting the RSV RNAs for degradation.

895

## 896 **Supplementary Figure**

### 897 **Supplementary Figure S1.**

#### 898 **Expression pattern and subcellular localization of NbP3IP.**

899 (A) Relative expression level of *NbP3IP* after RSV infection. *NbP3IP* expression was  
900 monitored by qRT-PCR at 0, 9, 20, 25 dpi. Values represent means  $\pm$  SD from three  
901 independent experiments. Double asterisks indicate  $P < 0.01$  of significant difference  
902 between RSV infected 0 day plants and other plants (Student's *t*-test, two-sided).

903 (B) Subcellular localization of NbP3IP-GFP. Confocal images showing the expression of  
904 NbP3IP-GFP in *N. benthamiana* leaf cells. Bars, 50  $\mu$ m.

905

### 906 **Supplementary Figure S2.**

#### 907 **NbP3IP interacts with p3 but not other VSRs.**

908 BiFC assays between NbP3IP and RSV p3, PVX p25, TBSV p19, TuMV HC-Pro in the  
909 leaves of *N. benthamiana* at 60 hpi. The N-terminal YFP fragment (YFPn) was fused to  
910 the N-terminus of NbP3IP, and the C-terminal YFP fragment (YFPc) was fused to  
911 N-terminus of p3, p25, p19, HC-Pro. Bars, 50  $\mu$ m.

912

### 913 **Supplementary Figure S3.**

#### 914 **The expression of NbP3IP has no effect on the VSR ability of other suppressors.**

915 The expression of NbP3IP did not affect the VSR ability of PVX p25 (Panel A), TBSV  
916 p19 (Panel B) or TuMV HC-Pro (Panel C). pBIN-GFP, viral suppressor and NbP3IP



917 (right patch) were co-infiltrated in 16c transgenic *N. benthamiana* plants leaves, with  
918 GUSp-Myc (left patch) substitution of NbP3IP-Myc as a control treatment. The patches  
919 were photographed under UV lamp at 5 dpi. The accumulations of GFP protein and  
920 mRNA were detected by western blot and northern blot. The accumulation of  
921 GFP-derived siRNA was analyzed by small RNA northern blot. The expression of  
922 GUSp-Myc and NbP3IP-Myc protein were detected by western blot with Myc antibody.  
923 The relative proteins levels in were normalized to rubisco, and the GFP mRNA and  
924 siRNA levels were normalized to rRNA. Relative values were calculated in comparison  
925 to the GUSp-Myc treatment (left patch), and this value was set as standard 1.

926

#### 927 **Supplementary Figure S4.**

#### 928 **Expression of NbP3IP has no effect on GFP accumulation and the autophagy** 929 **inhibitor 3-MA has no effect on p3 protein accumulation**

930 (A and B) The accumulation of unfused GFP is not affected by co-expression with  
931 NbP3IP. (A) Micrographs show cells co-expressing GFP and NbP3IP (right) or GFP and  
932 GUSp (left) as a control. Infiltrated *N. benthamiana* leaves were examined at 60 hpi. Bars,  
933 25  $\mu$ m.

934 (B) Western blot of total protein extracts from (A) detected with GFP antibody.  
935 Semi-quantitative RT-PCR was used for analysis of GFP transcripts. Actin served as an  
936 internal sqRT-PCR standard. The GFP accumulation when co-expressed with GUSp was  
937 normalized to rubisco, and this value used for comparative calculations.

938 (C) The subcellular localization of NbP3IP is not affected by co-expression of p3 and  
939 other VSRs. Images show cells co-expressing NbP3IP-GFP with RSV p3, PVX p25,  
940 TBSV p19, TuMV HC-Pro respectively. Infiltrated *N. benthamiana* leaves were examined  
941 at 60 hpi. Bars, 25  $\mu$ m.

942 (D) The autophagy inhibitor 3-MA does not affect accumulation of p3-GFP. Expression  
943 p3-GFP in *N. benthamiana* leaves for 48 h, followed by H<sub>2</sub>O or 10 mM 3-MA treatment

944 for 16 h. Proteins were detected by western blotting using an anti-GFP antibody. The  
945 value represents p3-GFP protein accumulation relative to rubisco, and the protein  
946 accumulation with H<sub>2</sub>O treatment used for comparison.

947

948 **Supplementary Figure S5.**

949 **Confirmation of the silencing of ATG5, ATG7 and GAPCs, and that silencing of**  
950 **GAPCs activates autophagy.**

951 (A) Real-time RT-PCR analysis to show relative expression levels of ATG5 and ATG7  
952 following TRV VIGS-mediated silencing. Primers are listed in the supplementary table 1.  
953 Upper leaves were examined at 15 dpi. Values represent means  $\pm$  SD from three  
954 independent experiments. (each sample containing three biological repeats and each  
955 biological repeat consisting of three technical replicates). Double asterisks indicate  
956  $P < 0.01$  of significant difference between TRV:00 control plants and TRV:ATG5 or  
957 TRV:ATG7 silenced plants (Student's *t*-test, two-sided).

958 (B) Real-time RT-PCR analysis of relative expression levels of three GAPCs after  
959 TRV-mediated silencing. Primers are listed in the supplementary table 1. Upper leaves  
960 were examined at 15 dpi. Values represent means  $\pm$  SD from three independent  
961 experiments. (each sample containing three biological repeats and each biological repeat  
962 consisting of three technical replicates). Double asterisks indicate  $P < 0.01$  of significant  
963 difference between TRV:00 control plants and TRV:GAPCs silenced plants (Student's  
964 *t*-test, two-sided).

965 (C) Silencing of GAPCs activates autophagy. Confocal micrographs showing the  
966 autophagy-specific marker CFP-NbATG8f expressed in GAPCs-silenced plants  
967 (TRV:GAPCs) and control (TRV:00) plants. Autophagosomes and autophagic bodies are  
968 revealed as CFP positive puncta in mesophyll cells. CFP-NbATG8f fusion proteins are in  
969 cyan, and chloroplasts are in red. Bars, 25  $\mu$ m.

970 (D) Relative autophagic activity in GAPCs-silenced plants. The autophagic activity in

971 TRV:00 control plants were used as the comparator. Values represent the mean  $\pm$ SD from  
972 three independent experiments. Approximately 150 cells were used to quantify  
973 autophagic structures in each treatment. Double asterisks indicate  $P < 0.01$  of significant  
974 difference between TRV:00 control plants and TRV:GAPCs silenced plants (Student's  
975 *t*-test, two-sided).

976 (E) Silencing of *ATG5* increases RSV accumulation level. Viral symptoms in RSV  
977 infected control plants (TRV:00) and *ATG5*-silenced plants (TRV:ATG5). Plants were  
978 photographed under normal light at 25 dpi of RSV infection.

979

#### 980 **Supplementary Figure S6.**

##### 981 **Transient expression of p3 does not induce autophagy.**

982 (A) Autophagic body production, as revealed by CFP-NbATG8f-labelled vesicle  
983 production, is not induced by p3. CFP-NbATG8f fusion proteins are in cyan, and  
984 chloroplasts are in red. Bars, 25  $\mu$ m.

985 (B) Relative autophagic activity in plants transiently expressing GUSp-Myc or p3-Myc.  
986 Values represent the mean  $\pm$ SD from three independent experiments. Approximately 150  
987 cells were used to quantify autophagic structures in each treatment.

988 (C) Representative TEM images from *N. benthamiana* leaf cells infiltrated with  
989 GUSp-Myc or p3-Myc at 60 hpi. Bars, 1  $\mu$ m.

990 (D) Relative autophagic activity in plants transiently expressing GUSp-Myc or p3-Myc.  
991 Values represent the mean  $\pm$  SD from three independent experiments. Autophagic bodies  
992 were counted from approximately 20 cells in each treatment.

993

#### 994 **Supplementary Figure S7.**

##### 995 **Silencing of *NbP3IP* inhibits the expression of ATGs.**

996 (A) Real-time RT-PCR analysis demonstrates the silencing of *NbP3IP*. Systemic leaves  
997 were examined after silencing of *NbP3IP* via TRV-based VIGS at 15 dpi. Values

998 represent means  $\pm$  SD from three independent experiments. (each sample containing three  
999 biological repeats and each biological repeat consisting of three technical replicates).  
1000 Double asterisks indicate  $P < 0.01$  of significant difference between TRV:00 control plants  
1001 and TRV:NbP3IP silenced plants. (Student's  $t$ -test, two-sided).

1002 (B) Real-time RT-PCR analysis of the relative expression of ATGs in  
1003 TRV:NbP3IP-silenced plants compared to TRV:00 plants. Values represent means  $\pm$  SD  
1004 from three independent experiments. (each sample containing three biological repeats and  
1005 each biological repeat consisting of three technical replicates). Double asterisks indicate  
1006  $P < 0.01$  of significant difference between TRV:00 control plants and TRV:NbP3IP  
1007 silenced plants. (Student's  $t$ -test, two-sided).

1008

#### 1009 **Supplementary Figure S8.**

#### 1010 **Sequence alignment of NbP3IP in different plant species.**

1011 Amino acid sequence alignment of NbP3IP with similar proteins from *Arabidopsis*  
1012 *thaliana* (NP\_191824.1), *Oryza sativa* (XP\_015644236.1), *Allium sativum* L  
1013 (ADK23953.1) and *Nicotiana benthamiana* (Niben101Scf03390g06004.1) reveals a low  
1014 overall homology among these proteins but identifies three conserved regions including  
1015 the autophagy-related LIR motif.

1016

#### 1017 **Supplementary table S1.**

#### 1018 **List of Primers Used in This Study**

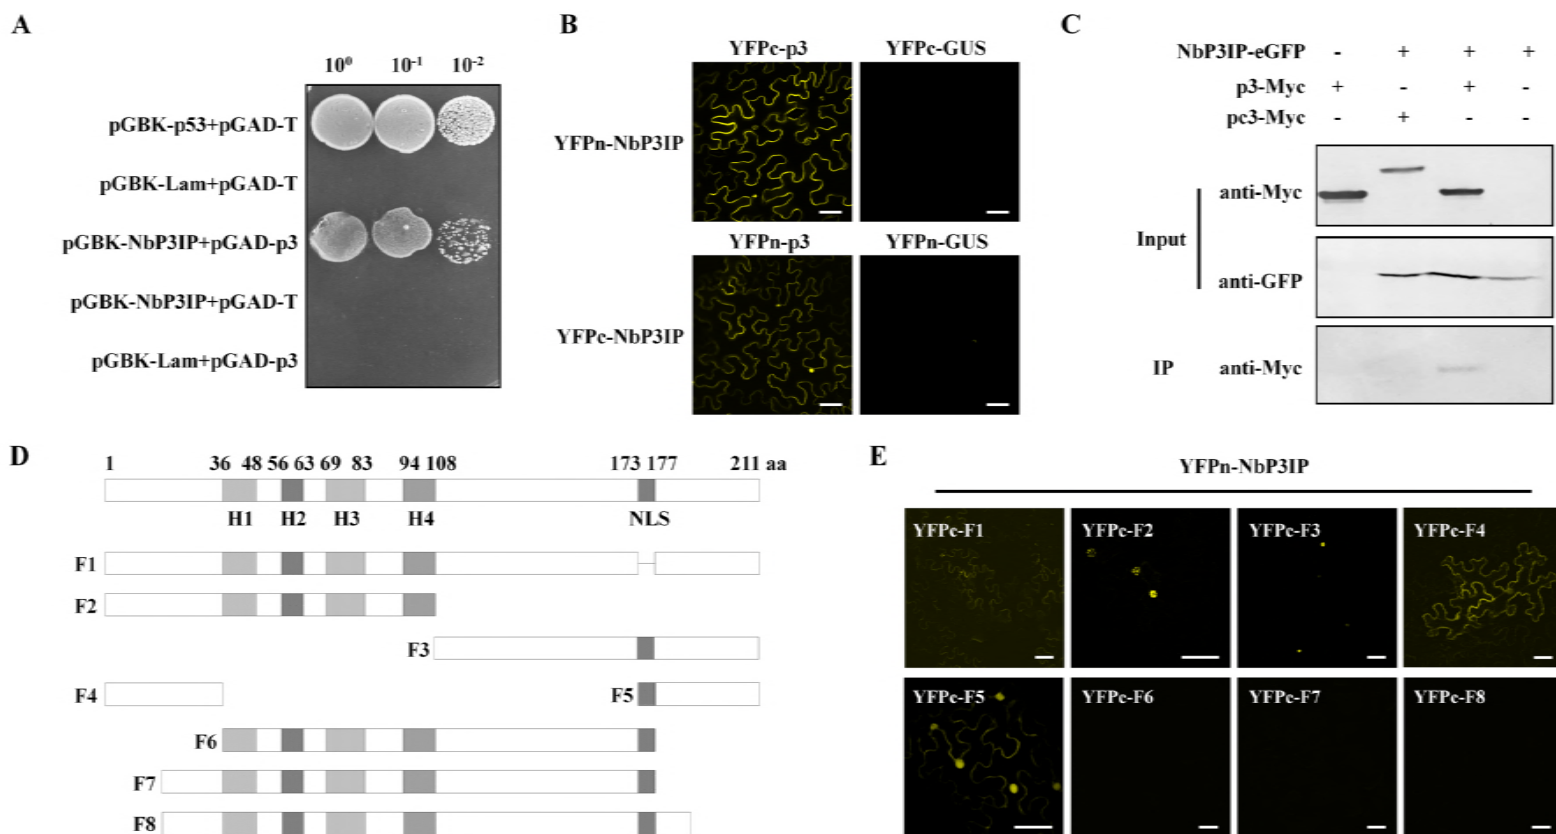

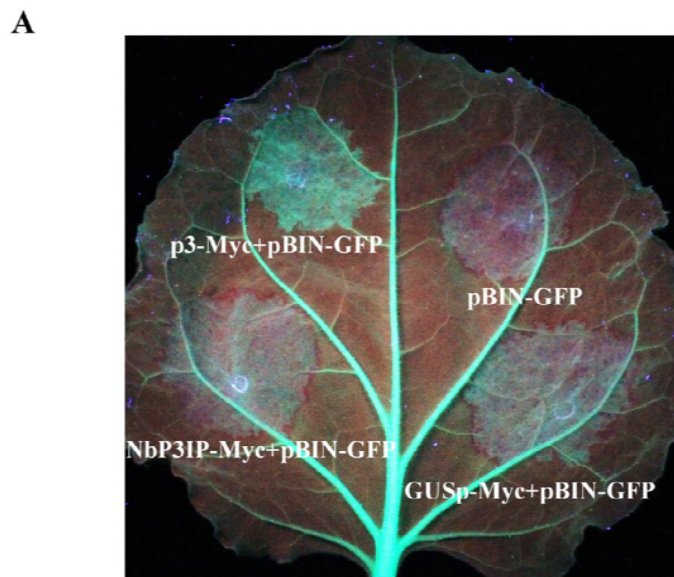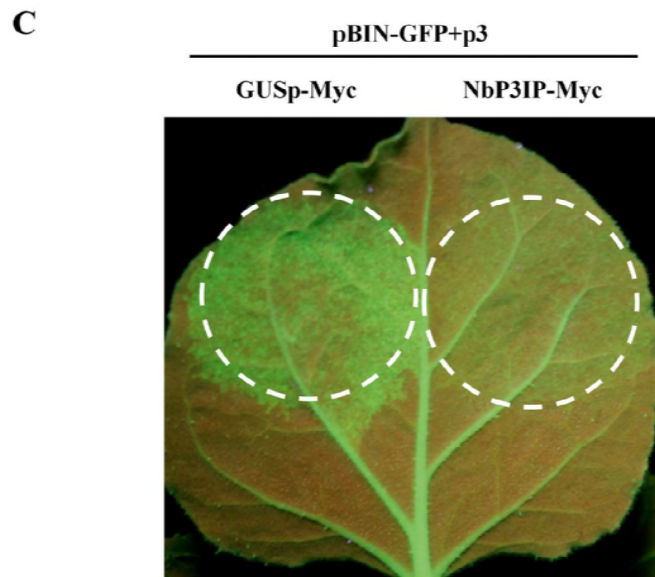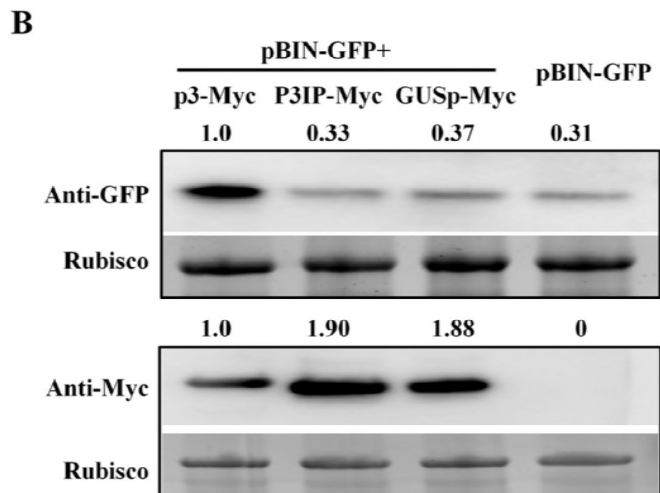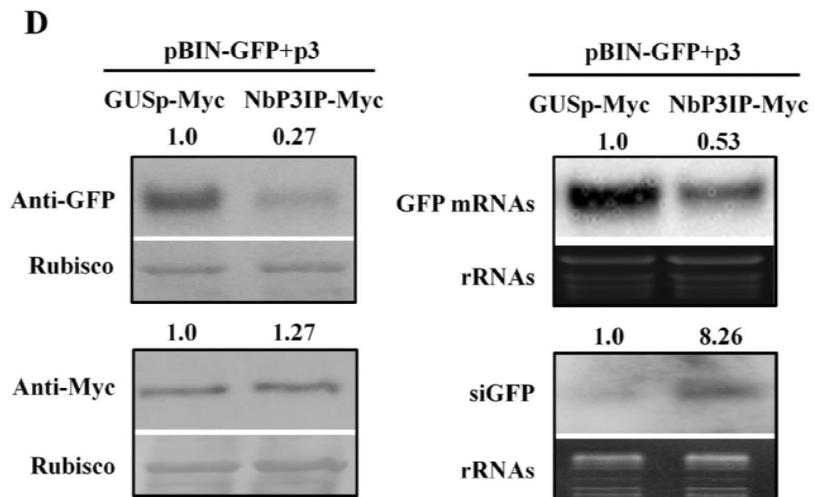

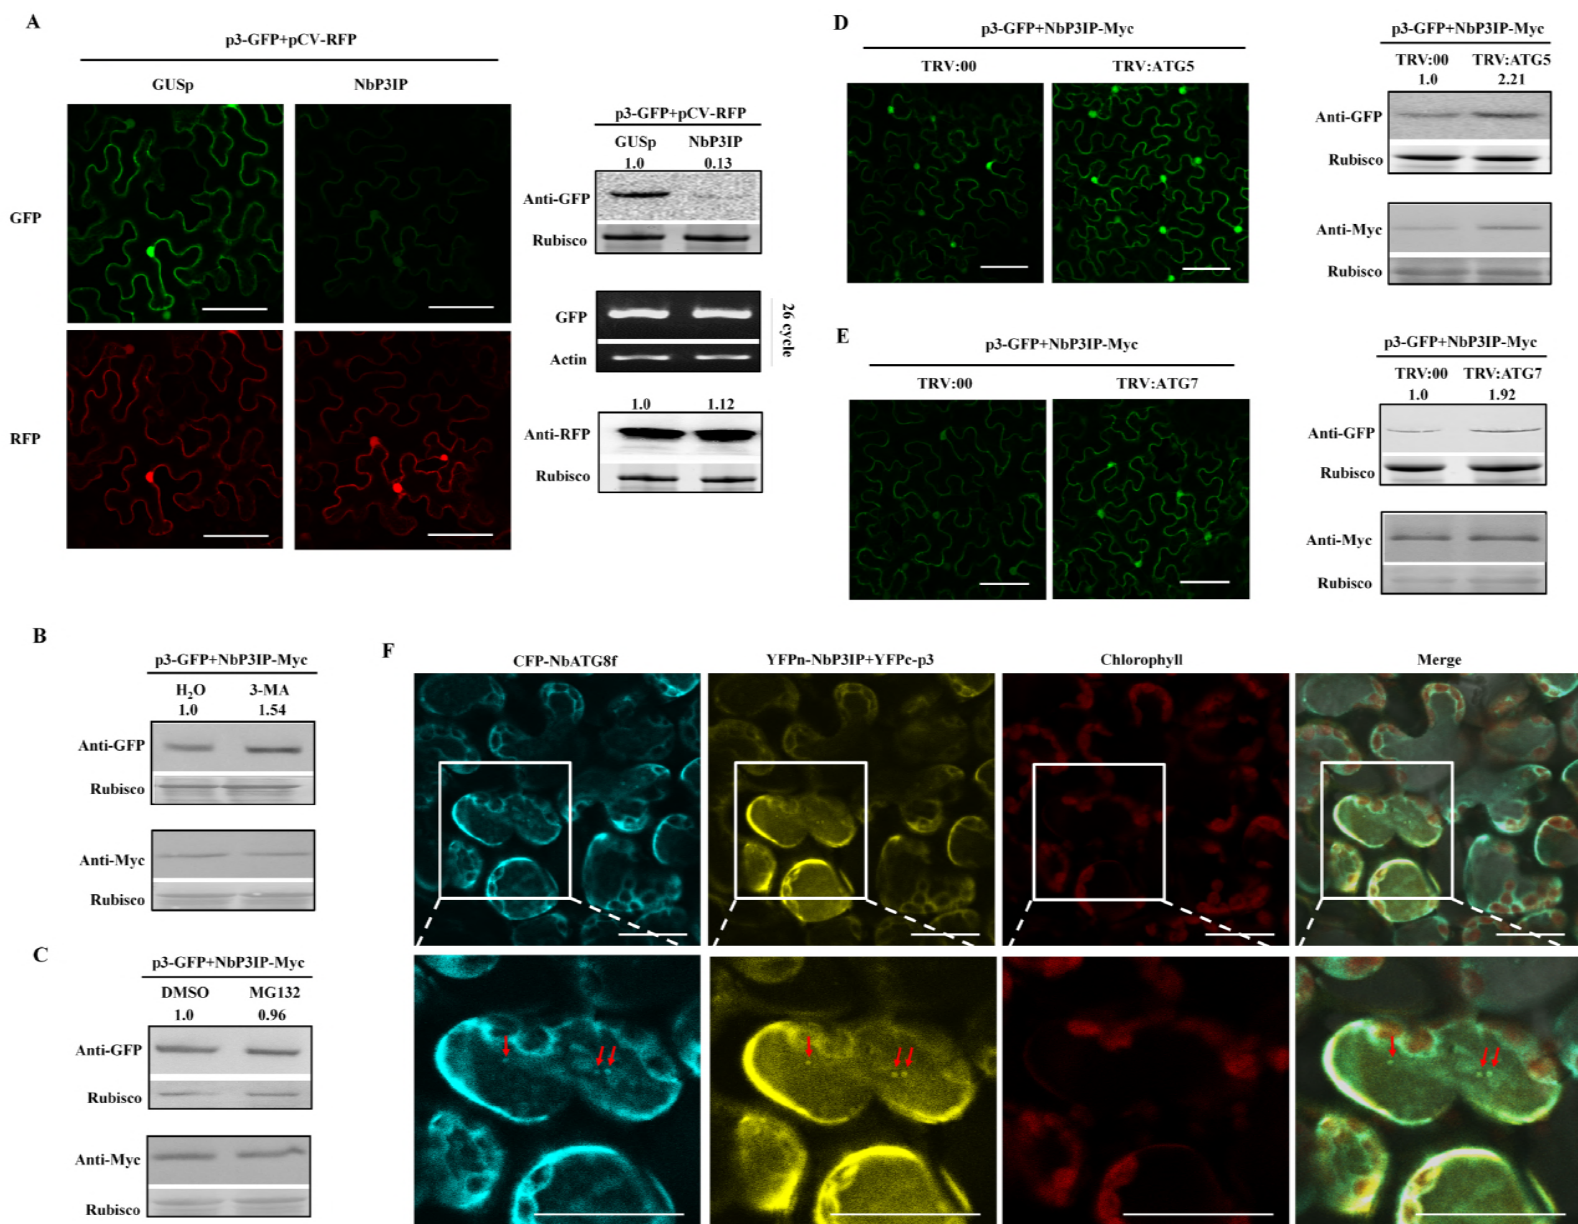

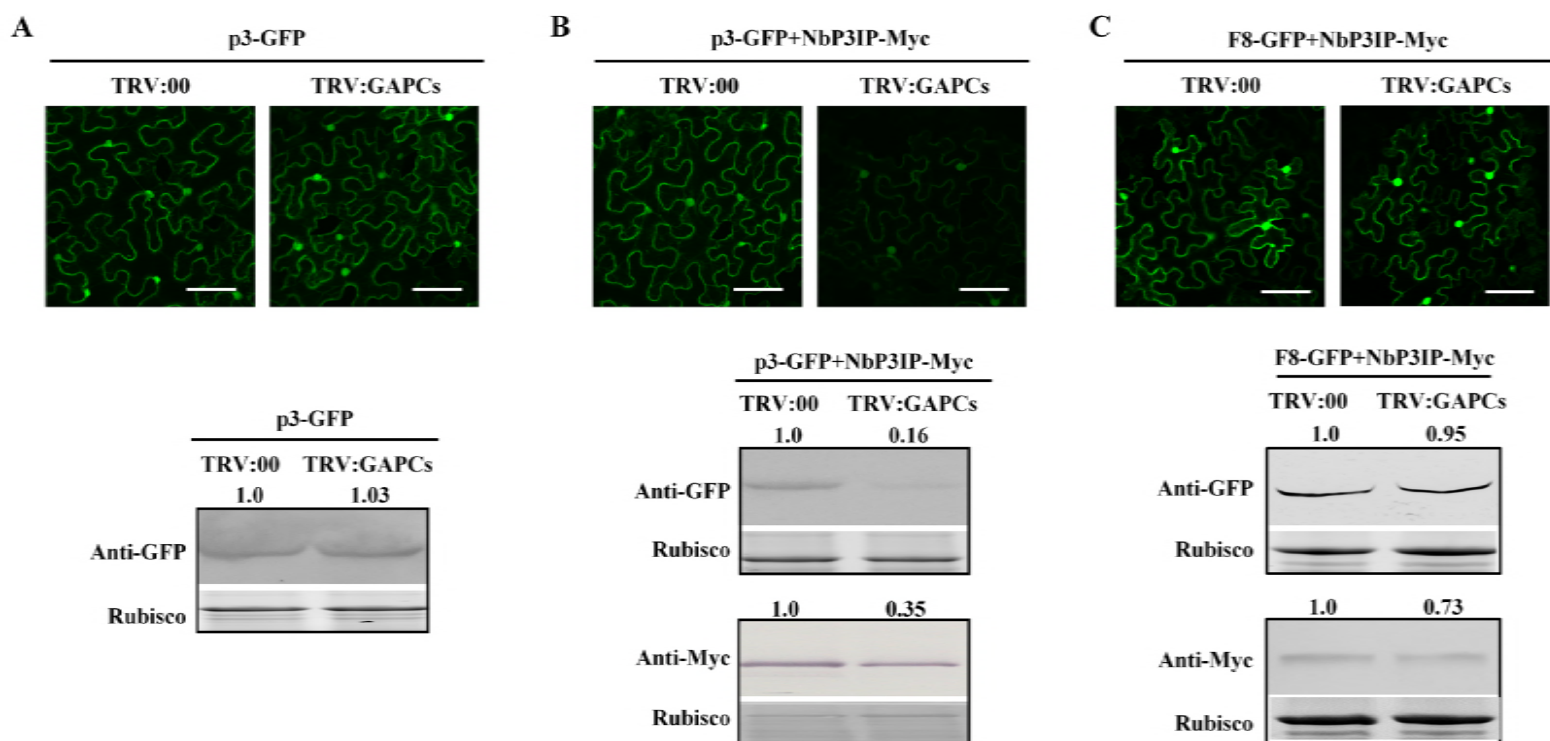



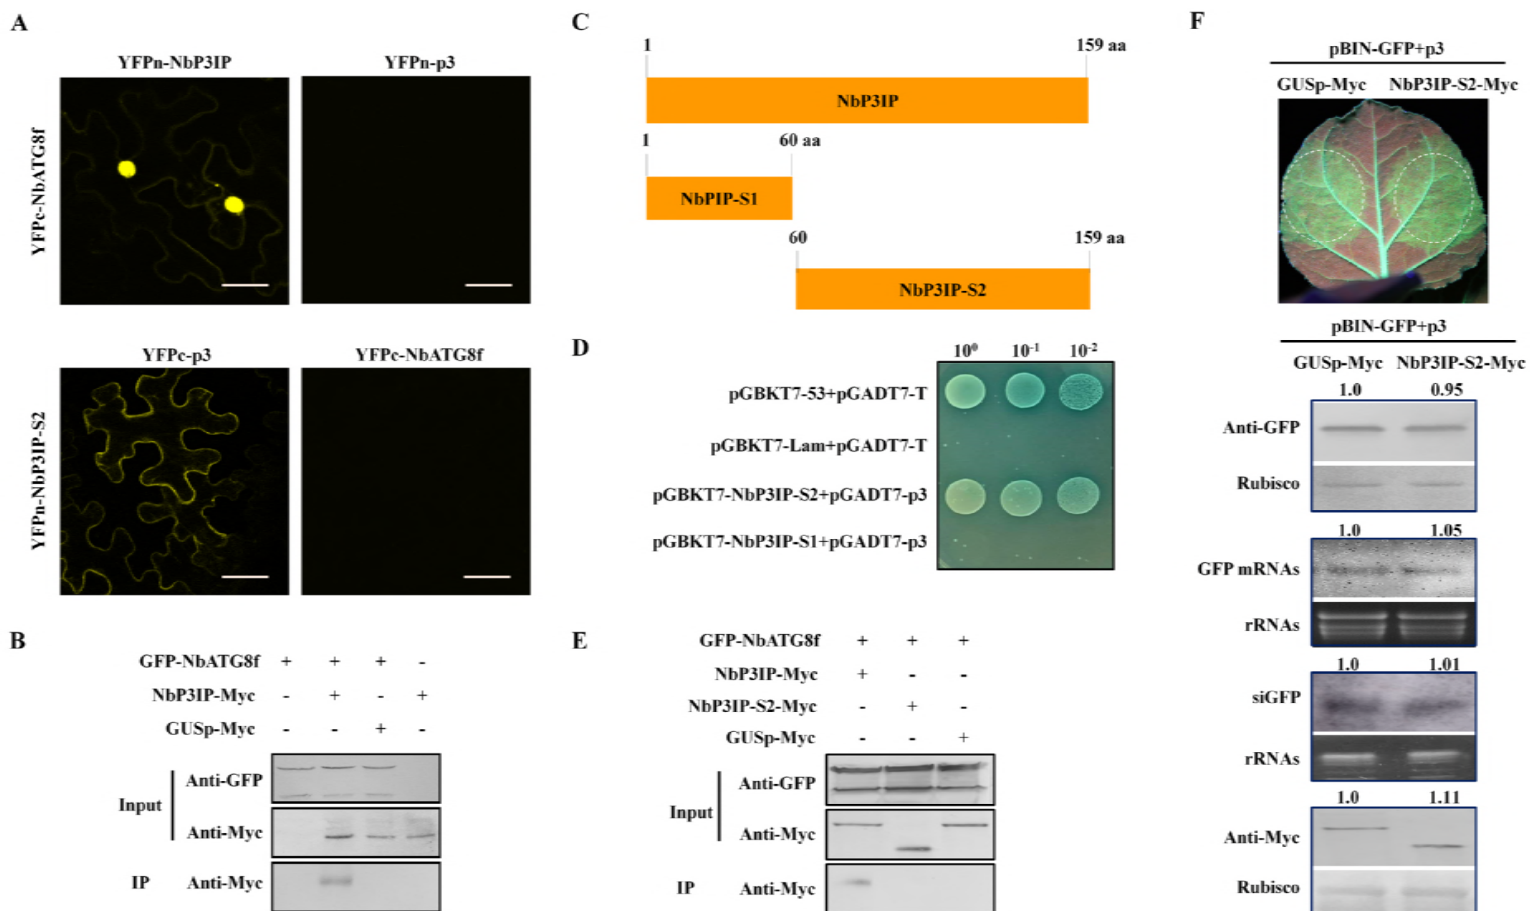

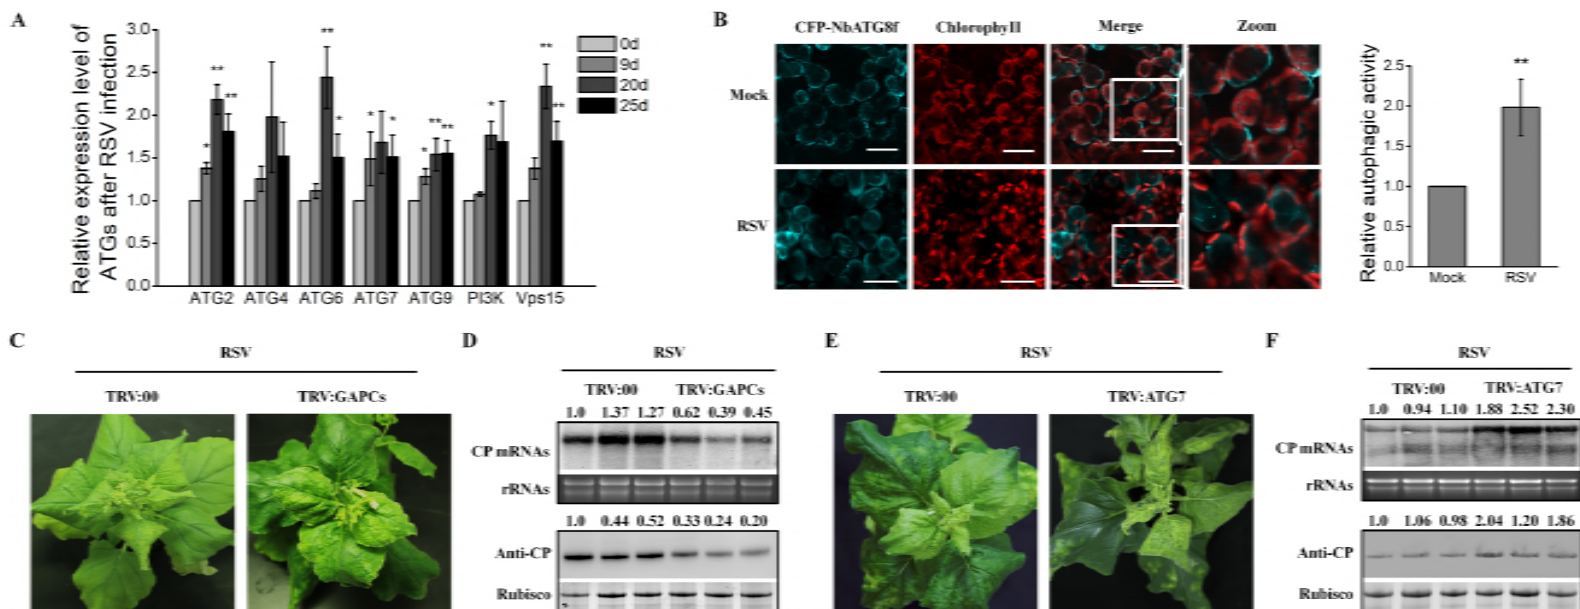

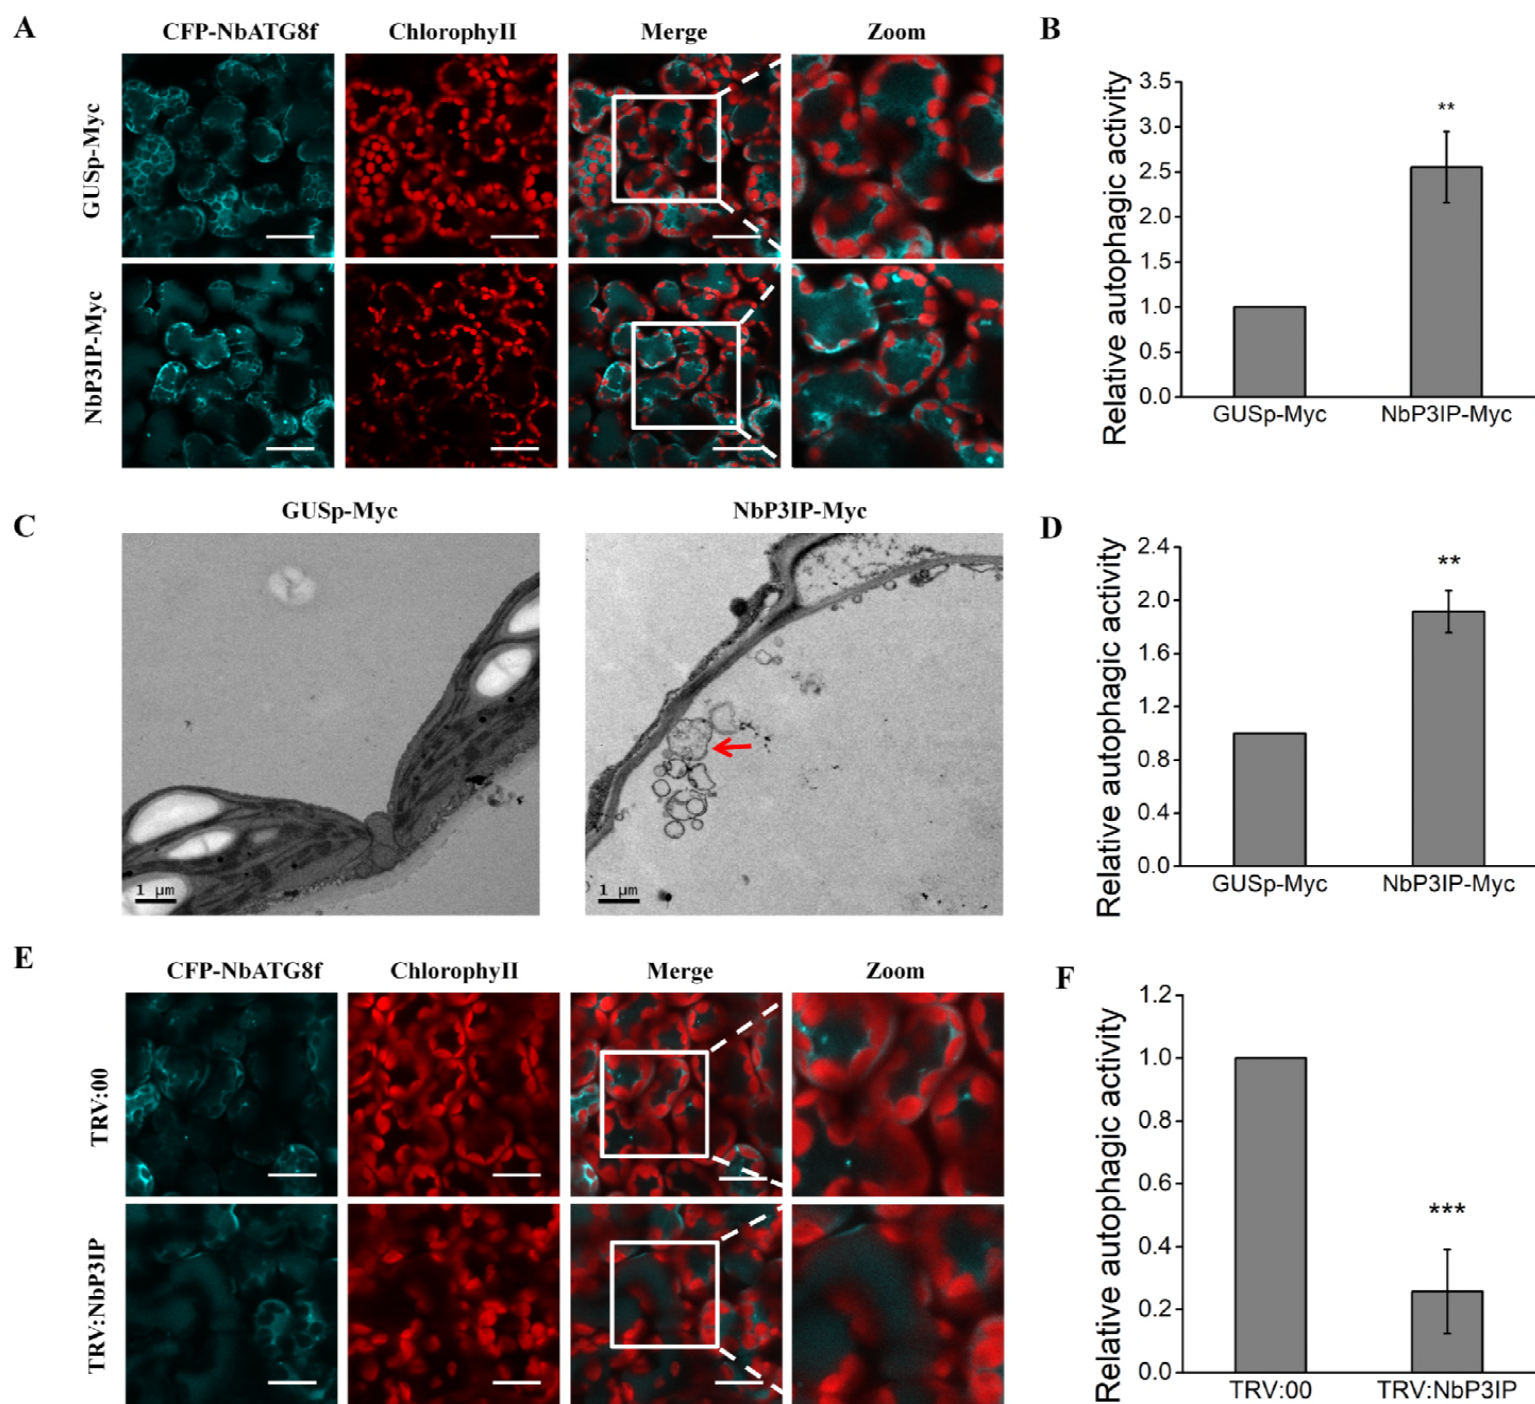

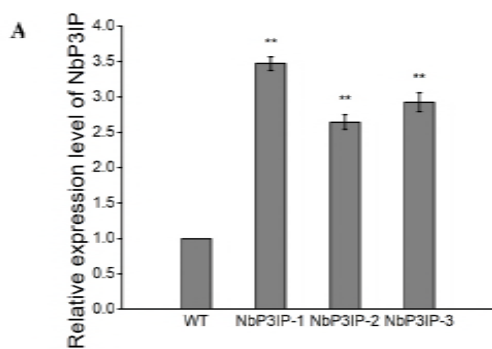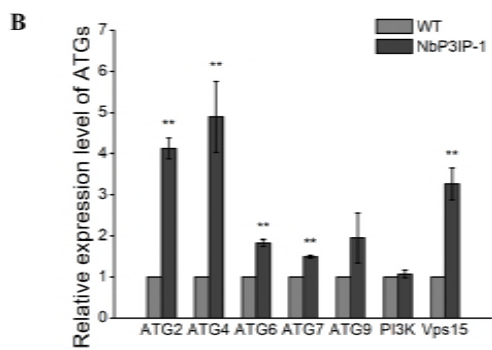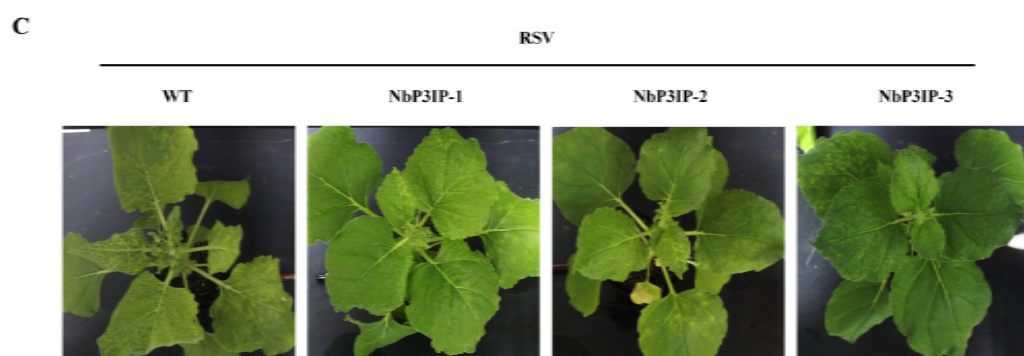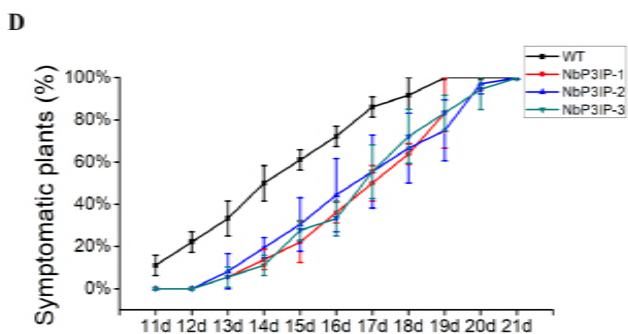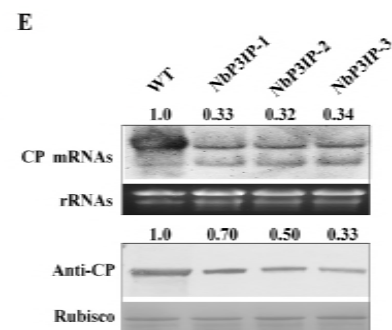

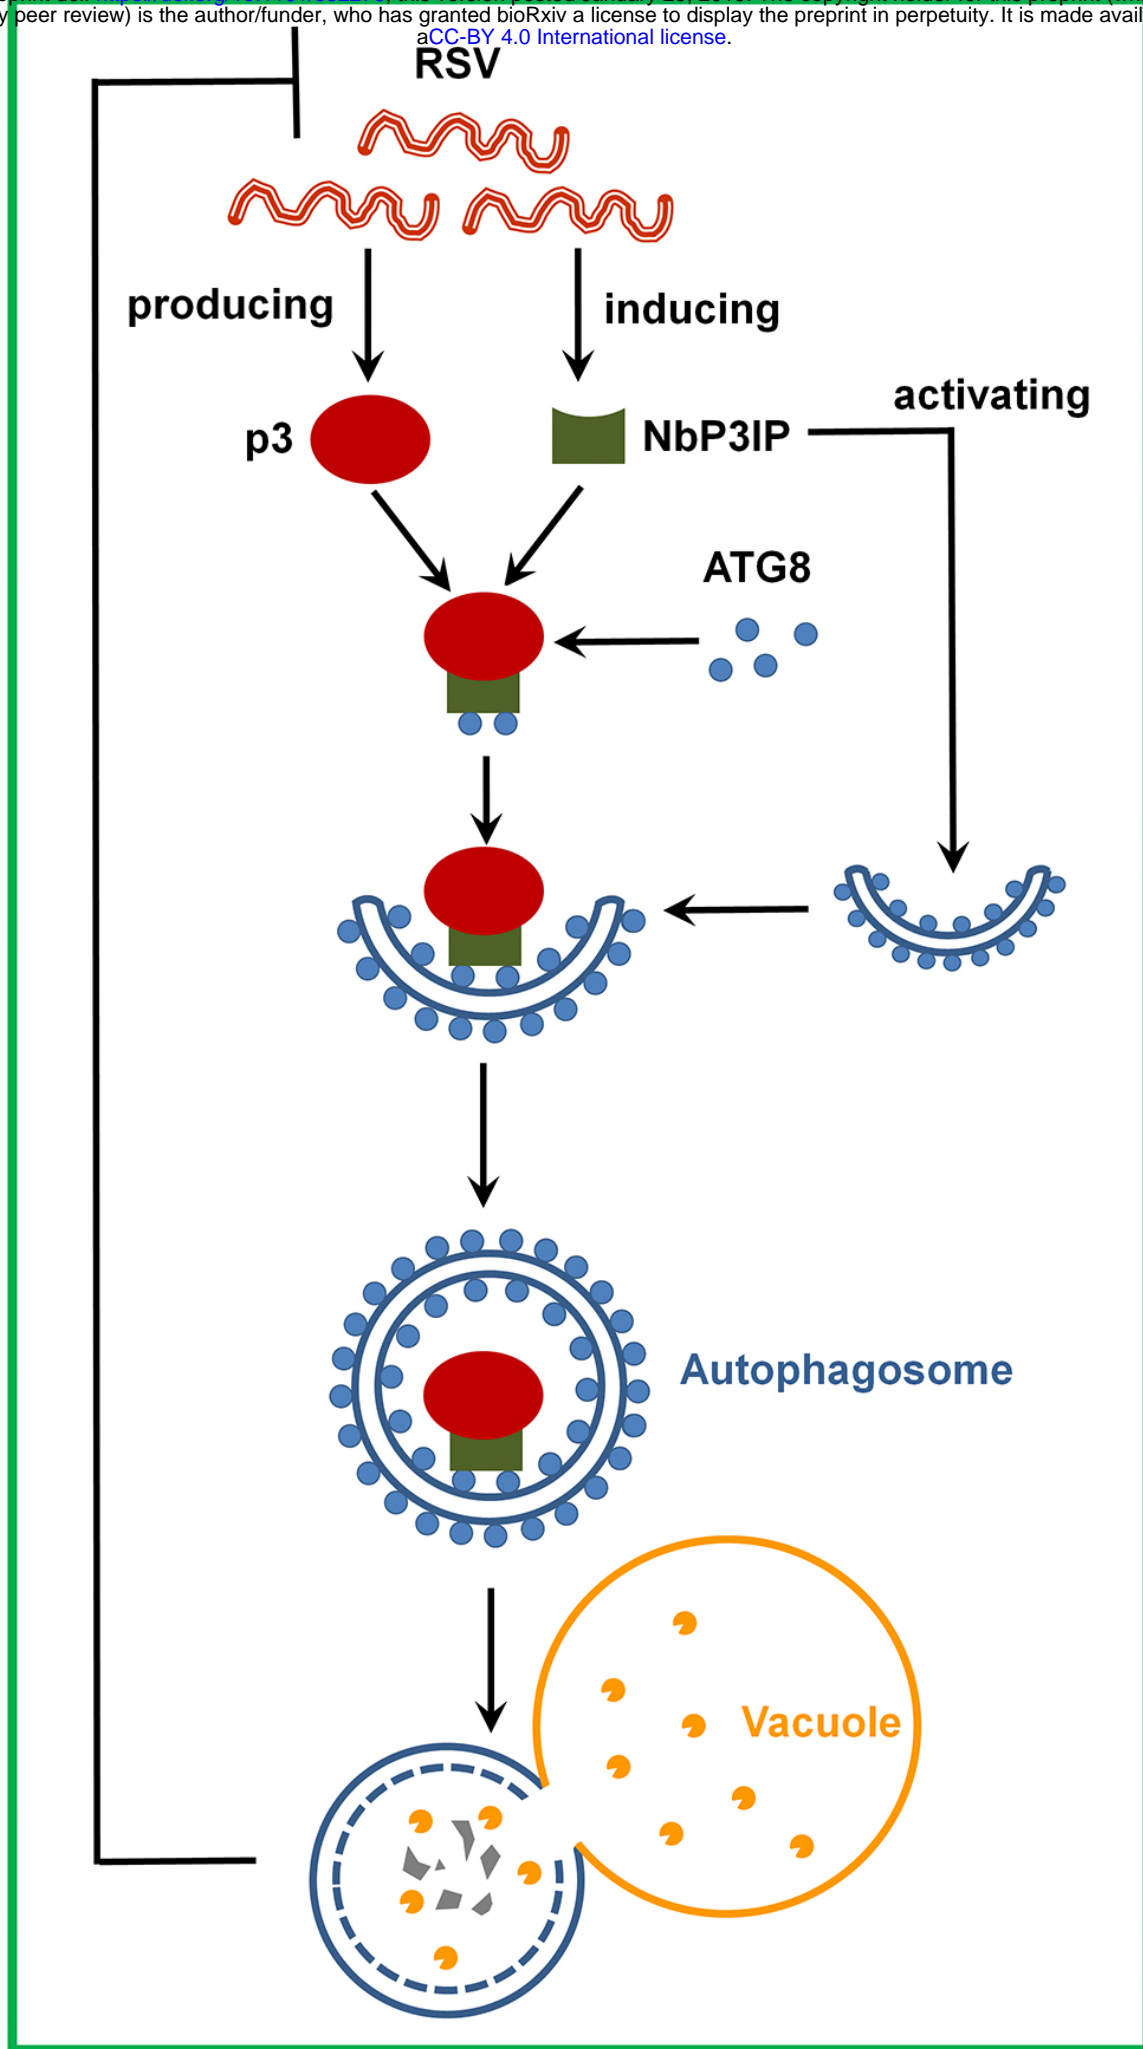

**A**

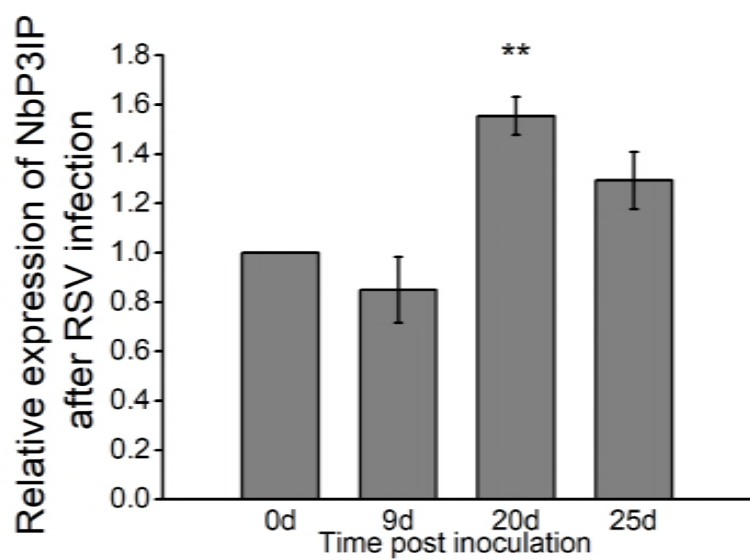

**B**

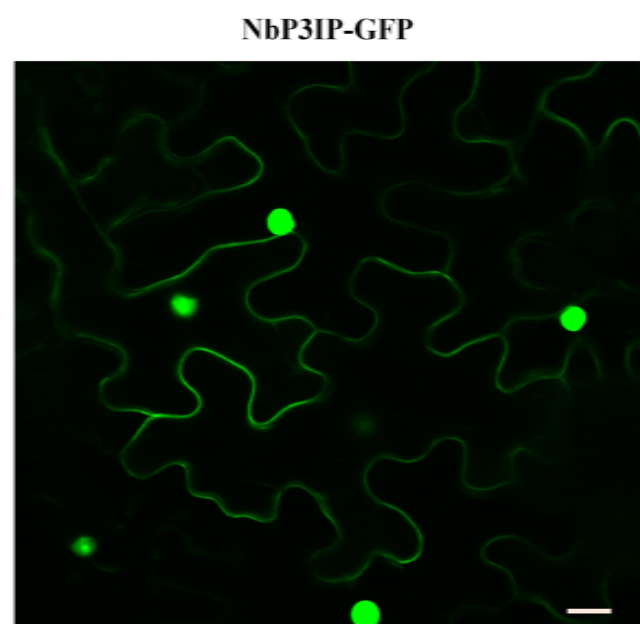

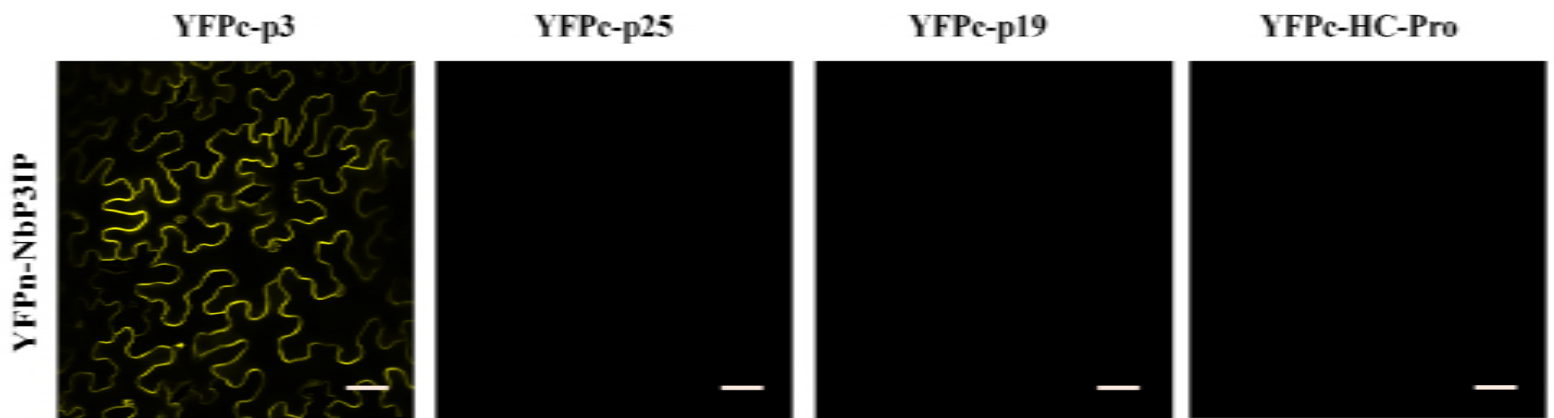

**A**

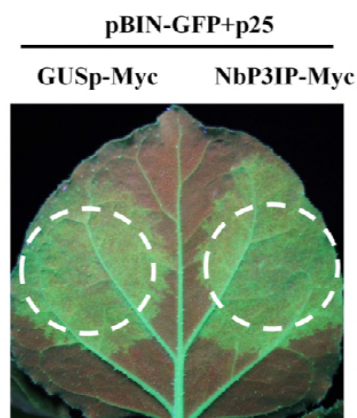

**B**

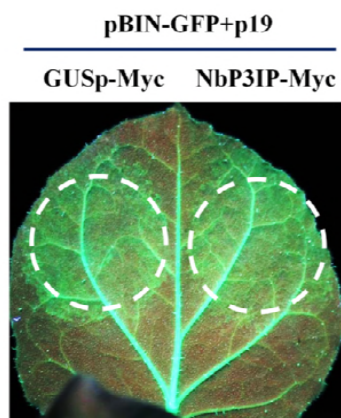

**C**

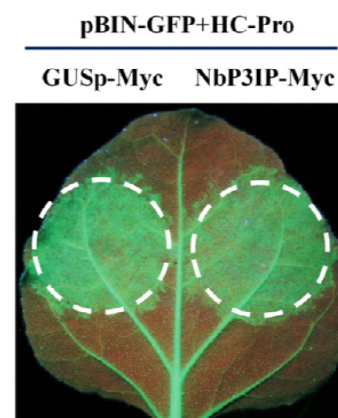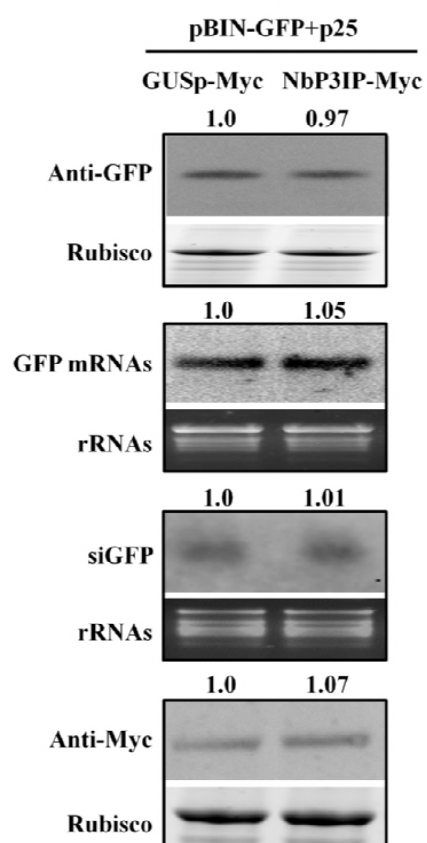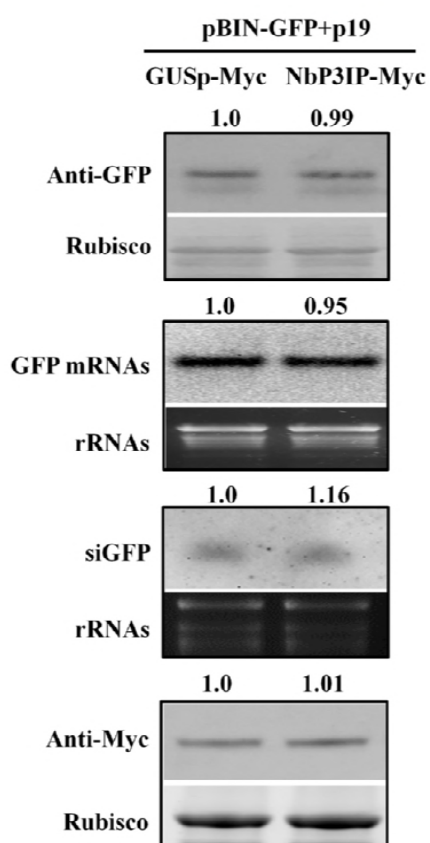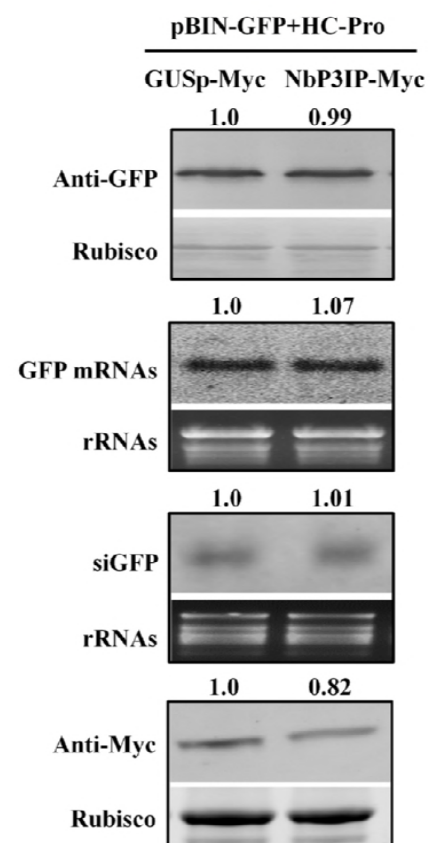



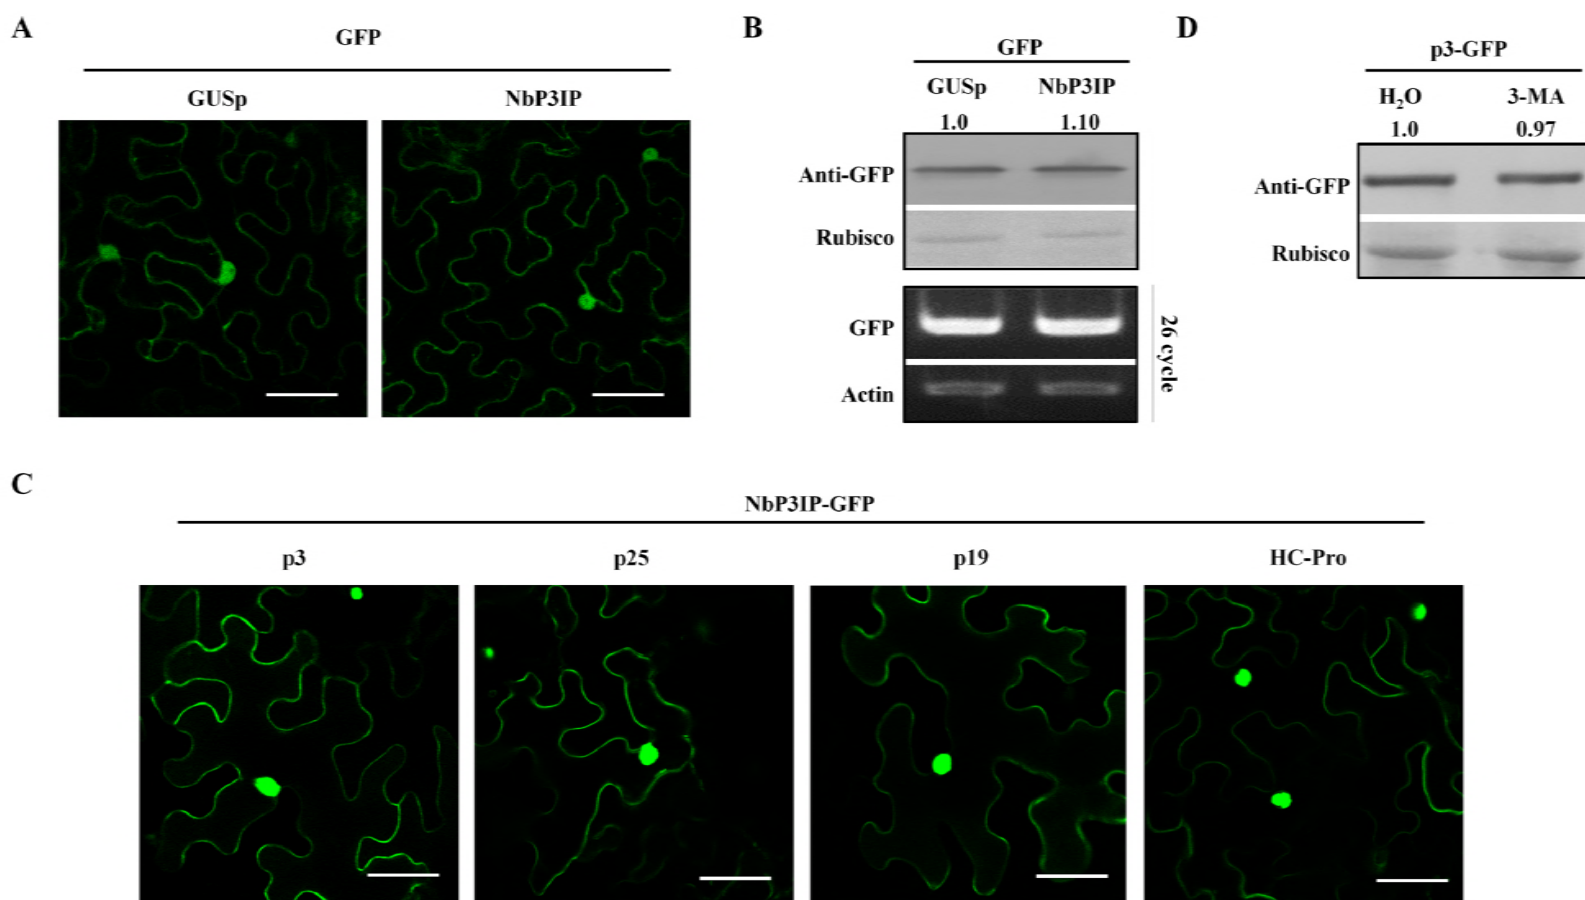

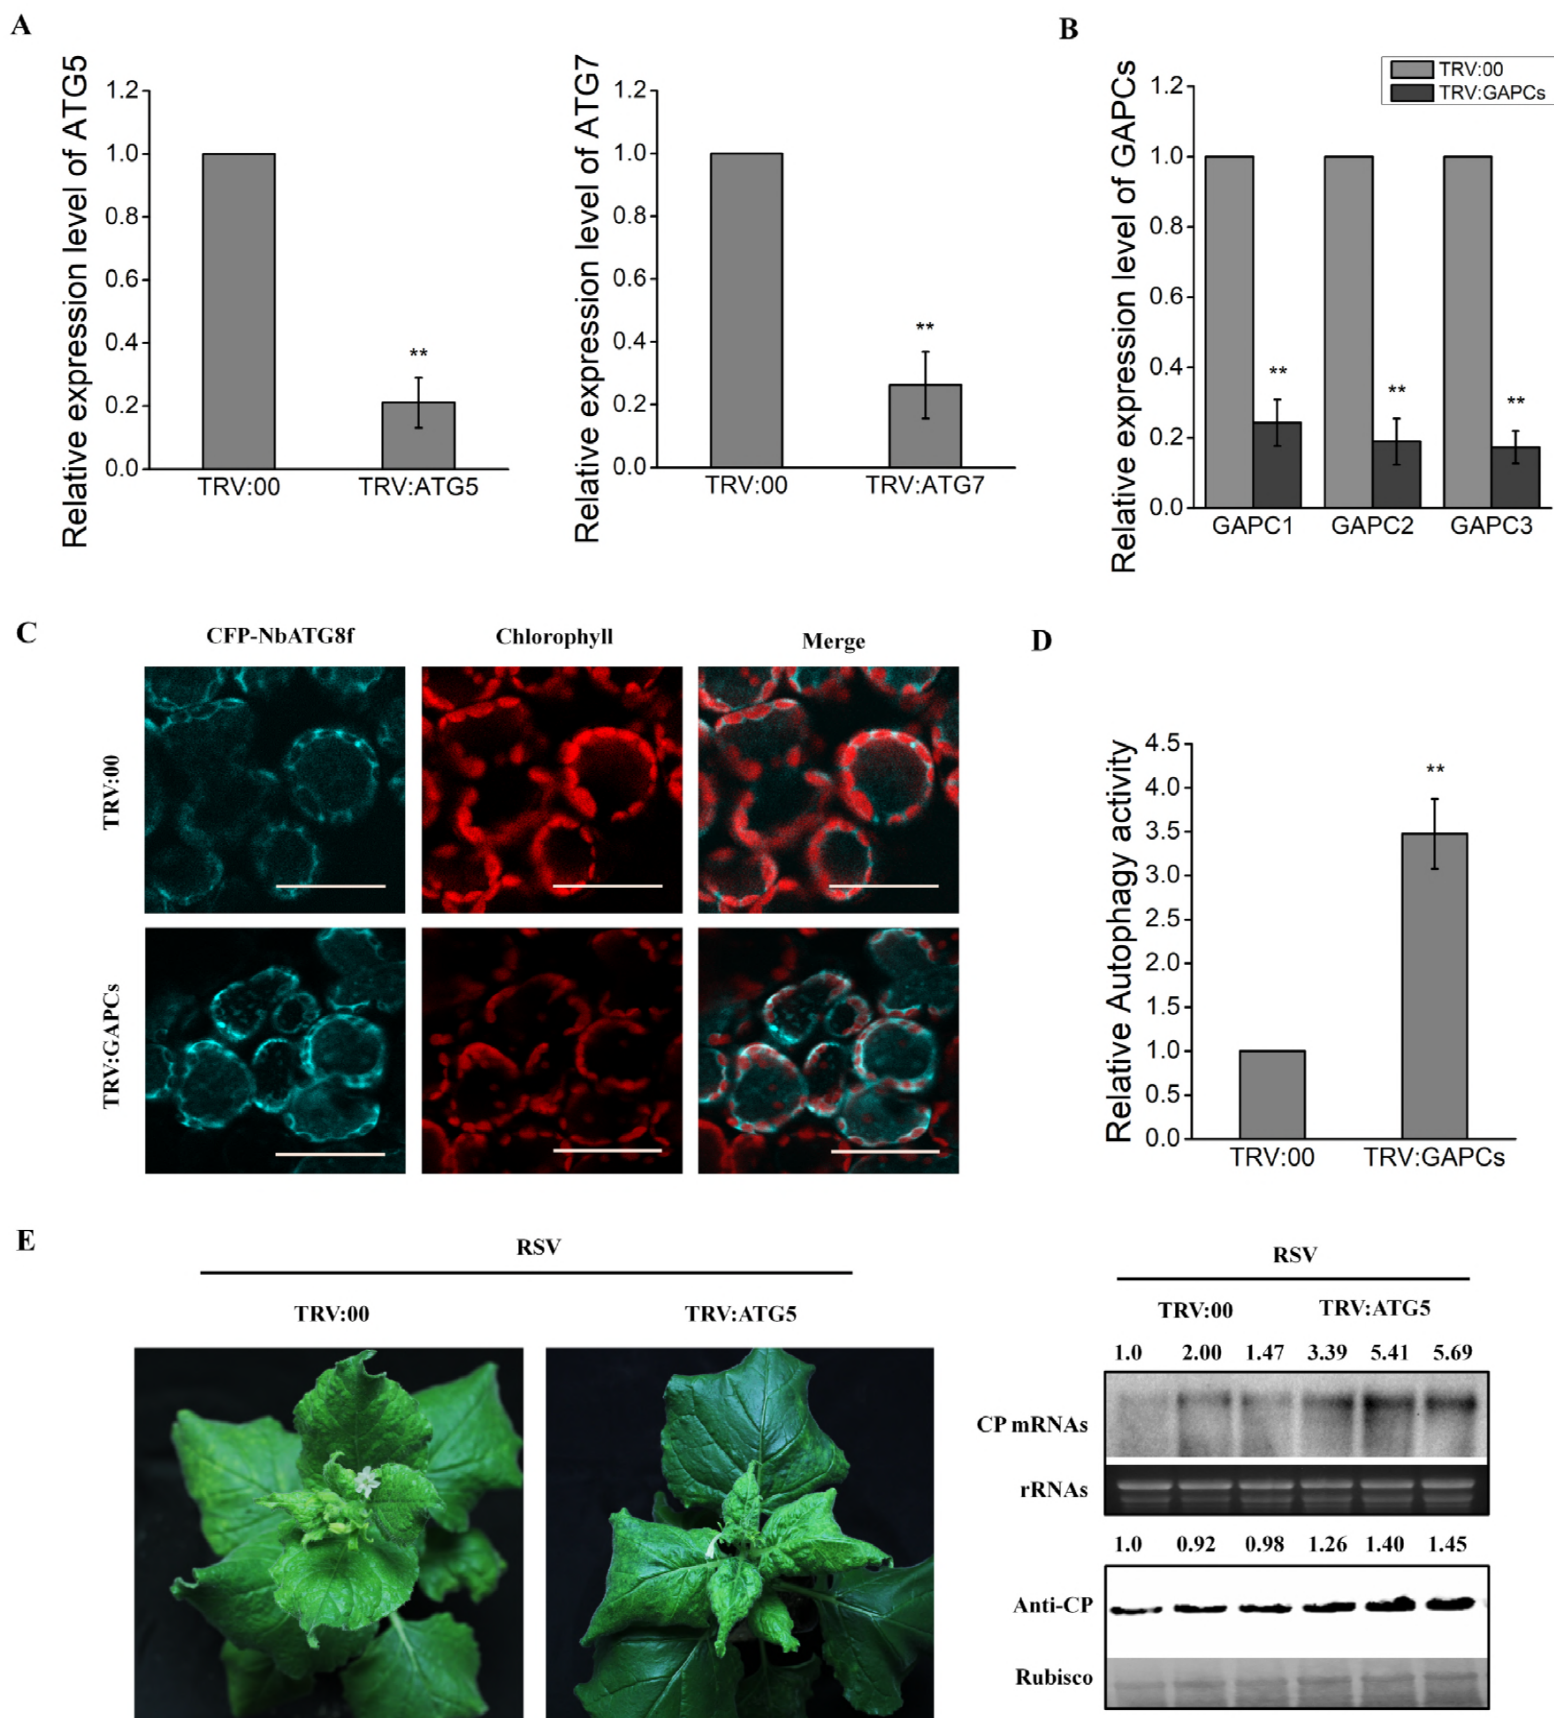

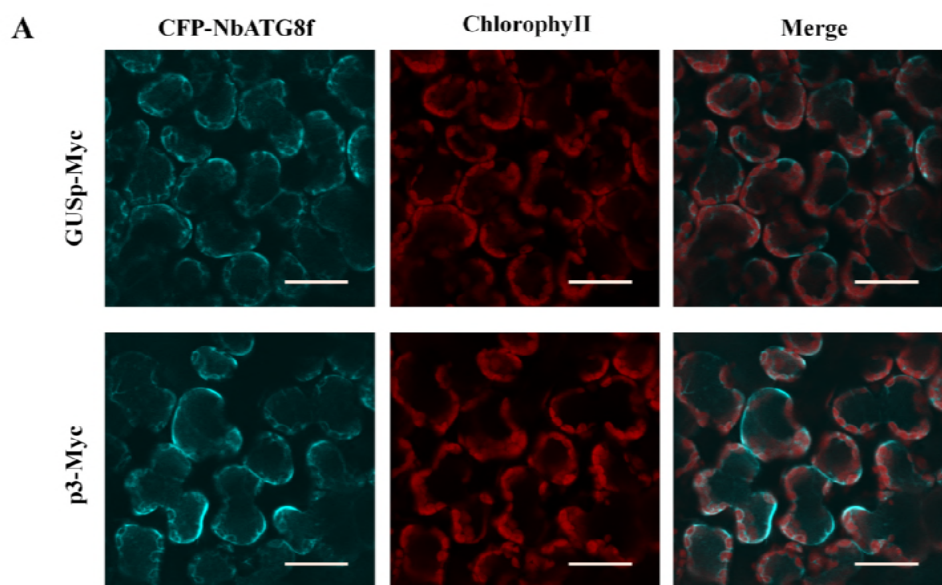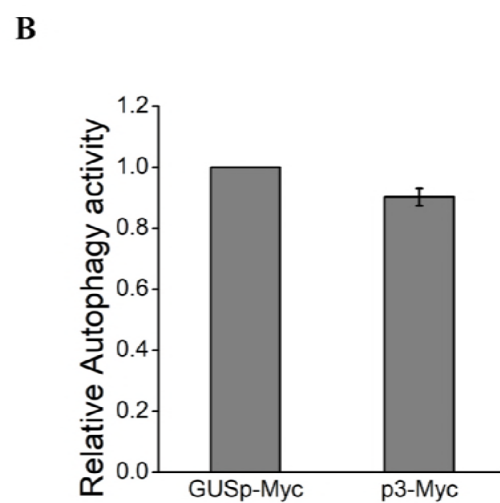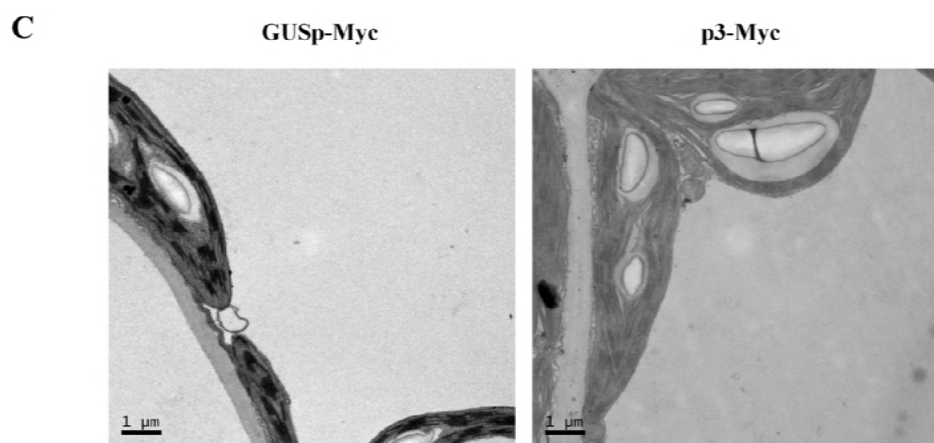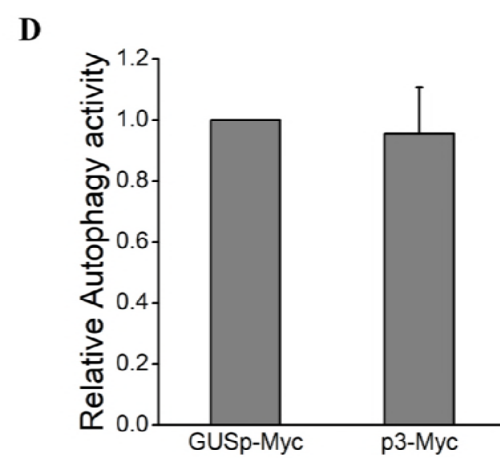

**A**

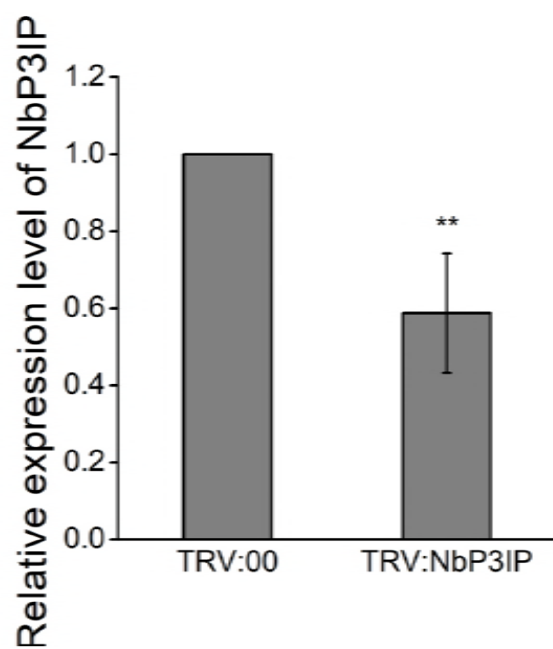

**B**

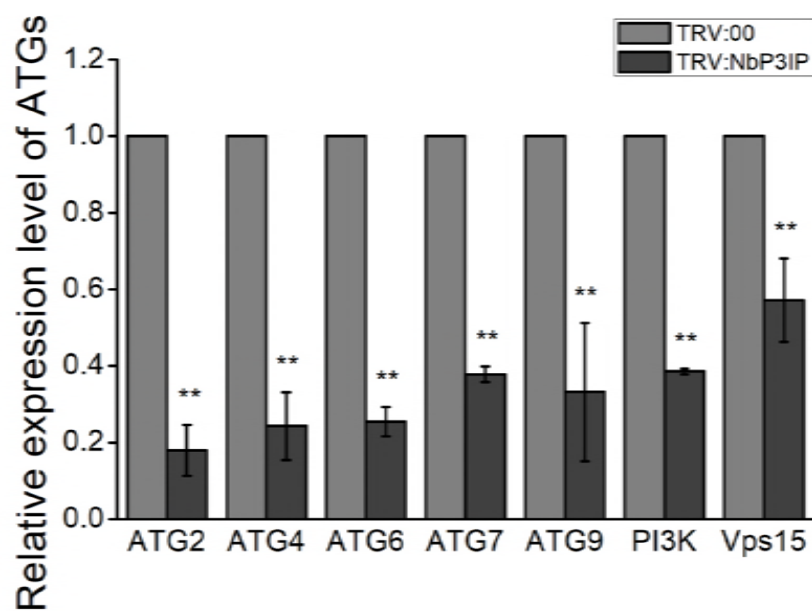

|             |                                                                   |               |     |
|-------------|-------------------------------------------------------------------|---------------|-----|
|             |                                                                   | <b>YxxL/I</b> |     |
| ARABIDOPSIS | .....MEITPKRYW.RRWR.GMEKLCGSS.....ETTSGRRKGRVKMDPT..RKK           |               | 42  |
| ORYZA       | .....MDHRTYKGGVKAY.WKHR.GYRLCAAAAQRRAPLPTAELGGGARRGGAPAQEPRRARRH  |               | 58  |
| ALLIUM      | .....MEKFNGGLKGYWERR...AHSRIDGVSGR.....RRPRGSRIKLGGGTVSRR         |               | 44  |
| NICOTIANA   | MEGLSASKNLYSGLKGYW.RRKRKGYERL6GA.....GRRRKIRVEDLST..GKK           |               | 47  |
| Consensus   |                                                                   | y             |     |
|             |                                                                   |               |     |
| ARABIDOPSIS | RFWR.IKIVPKLRI...IKTASPKKFLVWLRLDSYVKMMRIANSRVVGGSSGYGG.....SGFG  |               | 96  |
| ORYZA       | RGWR.VRHGLGRRV...LRALSPRRWLRLRDAYVSAMIRLASSPAVGFAGAPYCTAGQESFAR   |               | 119 |
| ALLIUM      | RWRIRLPK...KLKTIRFRFNPKRFEAKIRDAYVRMMLGFADMGAI.SGGFGYAGKGVDFGVE   |               | 104 |
| NICOTIANA   | RRFWKINLRPRLKLNKLERFSLKLLVNMNRDAYVNMMLKIANSRVMSSGGFGGLTG DYGVSGFG |               | 112 |
| Consensus   | r                                                                 | rd yv m a     |     |
|             |                                                                   |               |     |
| ARABIDOPSIS | SGQMKEYDEKMIVEIYKSIILMVQAQGNLIVHRDTPNNNLKLPSEPAVVSVVSSVVT         |               | 151 |
| ORYZA       | PRQLKEYDEKVIIVEIYRSILARGGVPVAVPAGGPAATATAAATTIRLSTAA....          |               | 170 |
| ALLIUM      | NRKMKEYDEKMIVQIYRN..LLVQRPDIVPTVDDGVPVAVVGTRAAPMTVV.....          |               | 152 |
| NICOTIANA   | MRQFKEYDEKMIVEIYRS..MVIAQGQLVNRDASAAAATKFGNEIMCQP.....            |               | 159 |
| Consensus   | keydek v iy                                                       | v             |     |
